# **G9a Promotes Breast Cancer Recurrence Through Repression of a Pro-inflammatory Program**

Nathaniel W. Mabe<sup>1</sup>, Shayna E. Wolery<sup>1</sup>, Rachel Newcomb<sup>1</sup>, Ryan C. Meingasner<sup>1</sup>, Brittany A. Vilona<sup>1</sup>,

Chao-Chieh Lin<sup>2</sup>, Ryan Lupo<sup>1</sup>, Jen-Tsan Chi<sup>2</sup>, and James V. Alvarez<sup>1\*</sup>

<sup>1</sup>Department of Pharmacology and Cancer Biology, Duke University, Durham, NC 27710, USA.

<sup>2</sup>Department of Molecular Genetics and Microbiology, Duke University, Durham, NC 27710, USA.

\*Correspondence:

450 Research Drive, Box 3813  
Durham NC 27710  
919-681-5479  
[james.alvarez@duke.edu](mailto:james.alvarez@duke.edu)

Keywords: G9a, breast cancer, recurrence, epigenetics, necroptosis

The authors declare that they have no conflict of interest relevant to this work.

**Running title:** G9a is a therapeutic target in recurrent breast cancer.

## Abstract

Epigenetic dysregulation is a common feature of cancer, and is thought to underlie many aspects of tumor progression. Using a genetically engineered mouse model of breast cancer recurrence, we show that recurrent mammary tumors undergo widespread epigenomic and transcriptional alterations, and acquire dependence on the G9a histone methyltransferase. Genetic ablation of G9a delays tumor recurrence, and pharmacologic inhibition of G9a slows the growth of recurrent tumors. Mechanistically, G9a activity is required to silence pro-inflammatory cytokines, including TNF, through H3K9 methylation at gene promoters. G9a inhibition induces re-expression of these cytokines, leading to p53 activation and necroptosis. Recurrent tumors upregulate receptor interacting protein kinase-3 (RIPK3) expression and are dependent upon RIPK3 activity. High RIPK3 expression renders recurrent tumors sensitive to necroptosis following G9a inhibition. These findings demonstrate that epigenetic rewiring – specifically G9a-mediated silencing of pro-necroptotic proteins – is a critical step in tumor recurrence and suggest that G9a is a targetable dependency in recurrent breast cancer.

## 1 **Introduction**

2           Amplification of Human Epidermal Growth Factor Receptor – 2 (ERBB2/HER2) occurs in  
3 approximately 20% of human breast cancers (Howlader et al., 2014). Advances in HER2 targeted therapies  
4 have dramatically improved patient outcomes, however, one in four women will experience a tumor relapse  
5 (Haque et al., 2012). Of these tumor recurrences, 30-40% will lose HER2 amplification, rendering them  
6 insensitive to anti-HER2 therapies and resulting in lower patient survival (Hurley et al., 2006; Mittendorf et  
7 al., 2009). Thus, new strategies are required to overcome therapeutic resistance in HER2-discordant recurrent  
8 breast tumors. Tumor relapse is generally thought to result from selection for genetic mutations. As such,  
9 molecular profiling of recurrent breast tumors has largely focused on genomic alterations that promote HER2-  
10 independent resistance, such as loss of PTEN (Nagata et al., 2004), gain-of-function mutations in PIK3CA  
11 (Loibl et al., 2018), and amplification of MET (Shattuck et al., 2008).

12           However, it is increasingly appreciated that epigenetic dysregulation can also contribute directly to  
13 tumor relapse and therapeutic resistance (Brien et al., 2016; Sharma et al., 2010). In cell culture models,  
14 dependency on epigenetic reprogramming has been shown to induce rapid and reversible resistance to targeted  
15 therapies and cytotoxic therapies (Shaffer et al., 2017; Sharma et al., 2010). In human cancer models,  
16 epigenetic modulation through EZH2 mediates adaptive resistance to chemotherapy in non-small cell lung  
17 cancer patient-derived xenografts (Gardner et al., 2017). Patient data also support the role of epigenetic  
18 dysregulation in breast cancer recurrence. Global histone lysine hypoacetylation and DNA hypomethylation  
19 are associated with poor prognosis in breast cancer (Elsheikh et al., 2009; Selli et al., 2019; Suzuki et al., 2009),  
20 and transcriptional reprogramming is a hallmark of chemoresistant recurrent breast tumors (Yates et al., 2017).  
21 Consistent with these observations, the histone deacetylase (HDAC) inhibitor Entinostat prolongs survival in  
22 patients with recurrent breast cancer (Tomita et al., 2016). Together, these studies implicate epigenetic  
23 mechanisms in promoting drug resistance and breast tumor relapse. However, specific epigenetic alterations  
24 that underlie breast cancer recurrence and therapeutic resistance have not been well defined, and could identify  
25 clinically relevant targets in preventing or treating recurrent disease.

26 To gain insight into biological pathways driving tumor recurrence, we and others have used a  
27 genetically engineered mouse (GEM) mammary tumor model with conditional Her2 expression that mimics  
28 key features of breast cancer recurrence in women (Alvarez et al., 2013; Goel et al., 2016; Moody et al., 2002).  
29 Administration of doxycycline (dox) to MMTV-rtTA;TetO-Her2/neu (MTB;TAN) mice induces Her2  
30 expression in mammary epithelial cells, leading to the formation of Her2-driven adenocarcinomas. Dox  
31 withdrawal leads to tumor regression, but a small population of tumor cells can survive Her2 downregulation  
32 and persist as minimal residual disease. After a latency of several months, these residual tumor cells  
33 spontaneously re-initiate proliferation and give rise to recurrent tumors. Importantly, these tumors recur  
34 independently of the Her2 oncogene, suggesting tumors have acquired Her2-independent bypass mechanisms  
35 for their growth, mirroring observations in HER2-discordant human breast cancers. Previous studies using  
36 HER2-driven recurrence models have identified Met amplification (Feng et al., 2014) and Cdkn2a deletions  
37 (Goel et al., 2016) as critical genetic drivers of tumor recurrence. While genetic alterations underlie some  
38 tumor relapses, not all tumors have a clear genomic basis for recurrence. We reasoned that a subset of recurrent  
39 tumors may leverage non-genetic mechanisms to adapt to and recur following HER2 withdrawal. Thus,  
40 characterizing epigenetic and transcriptional profiles of primary and recurrent tumors could identify non-  
41 genetic mechanisms by which tumor cells survive Her2 downregulation and form recurrent tumors. In the  
42 current study we used these GEM models to evaluate the contribution of epigenetic remodeling to breast cancer  
43 recurrence.

## 44 **Results**

45 *Tumor recurrence is associated with widespread epigenetic remodeling.*

46 To gain insight into epigenetic changes associated with tumor recurrence, we derived cell lines from  
47 three primary and five recurrent tumors arising in MTB;TAN mice (Alvarez et al., 2013; Mabe et al., 2018).  
48 Prior work in several models has shown that Met amplification is a common genetic escape mechanism  
49 following oncogene withdrawal (Feng et al., 2014; Liu et al., 2011). We first characterized whether primary  
50 and recurrent tumor cells exhibit Met amplification. Copy number analysis revealed that while none of the  
51 primary tumor cells had Met amplification, 2/5 recurrent tumor cells had amplified Met between 5- and 15-  
52 fold (**Figure S1A**). Met transcript levels followed the same pattern (**Figure S1B**). We reasoned that in recurrent  
53 tumor cell lines #1-3, which lack Met amplification, tumor recurrence may instead be driven by epigenetic  
54 reprogramming.

55 To characterize epigenetic alterations in these tumors, we performed genome-wide ChIP-sequencing  
56 on primary cells (#1 and #2), and recurrent tumor cells (#1, #2 and #3). We evaluated histone marks H3K9ac  
57 and H3K4me3, which are commonly localized to actively transcribed genes, and the repressive histone mark  
58 H3K27me3, which is found at repressive heterochromatin (Wang et al., 2009). RNA polymerase II (RNAPol2)  
59 was included to mark actively transcribed genes. Global analysis showed that each of the histone marks, as  
60 well as RNAPol2, was enriched at the promoter and the transcription start site of active genes, as was expected  
61 based on their reported localization (**Figure S1C**). To evaluate specific epigenetic alterations between primary  
62 and recurrent tumor cohorts, we performed differential binding (DiffBind) analysis for each histone  
63 modification and RNAPol2. 29% of H3K4me3 peaks, 47% of H3K9ac peaks, and 18% of H3K27me3 peaks  
64 were differentially enriched in either primary or recurrent tumor cells, with recurrent cells having slightly more  
65 differential peaks than primary cells (**Figure 1A**). Half of the RNAPol2 peaks we identified were differentially  
66 enriched in either primary or recurrent cells, with approximately equal numbers enriched in each cohort  
67 (**Figure 1A**). While most differential peaks were found at active gene regulatory elements, an increased  
68 number of peaks for H3K4me3, H3K9ac and H3K27me3 in recurrent cell lines were located in intergenic  
69 regions (>5 kb distance from a transcriptional start site; **Figure S1D**). Intergenic localization of H3K9ac

70 (Karmodiya et al., 2012), H3K4me3 (Pekowska et al., 2011) and RNAPol2 (De Santa et al., 2010) has been  
71 described at enhancer or regulatory regions. To examine whether differential intergenic peaks overlapped with  
72 enhancers, we compared their localization with enhancer marks from an ENCODE dataset of mouse  
73 fibroblasts. There was a substantial overlap of differential H3K4me3 and H3K9ac intergenic peaks with the  
74 enhancer marks H3K4me1 and H3K27ac from ENCODE (**Figure S1E**), suggesting that these intergenic peaks  
75 may represent newly acquired enhancers in recurrent tumor cells (Bradner et al., 2017).

76 We next compared the enrichment of these marks at individual gene promoters between primary and  
77 recurrent tumor cells. One group of genes was epigenetically repressed in recurrent tumor cells. The promoters  
78 of these genes had elevated enrichment of H3K9ac, H3K4me3, and RNAPol2 and decreased enrichment of  
79 H3K27me3 in primary tumor cells compared to recurrent tumor cells (**Figure 1B**). Conversely, genes that  
80 were epigenetically activated in recurrent tumor cells displayed the opposite pattern, with elevated H3K9ac,  
81 H3K4me, and RNAPol2 and decreased H3K27me3 peaks (**Figure 1B**). Taken together, these results indicate  
82 that tumor recurrence is associated with genome-wide epigenetic remodeling.

83  
84 *Tumor recurrence is associated with transcriptional rewiring.*

85 Histone modifications are closely linked to the regulation of gene transcription. We reasoned that the  
86 genome-wide alterations in histone modifications between primary and recurrent tumor were likely associated  
87 with gene expression changes. To address this, we performed RNA-sequencing on three primary tumor cell  
88 lines (#1, #2 and #3) and four recurrent tumor cell lines (#1, #2, #3, and #4). Primary and recurrent tumors  
89 exhibited global differences in gene expression (**Figure 1C**) and clustered into distinct groups by principal  
90 components analysis (**Figure 1D**). Interestingly, the Met-amplified recurrent line (#4) had a gene expression  
91 pattern distinct from both primary and non-Met amplified recurrent tumor cells (**Figure 1C and D**), suggesting  
92 that Met amplification represents a distinct mode of tumor recurrence. Differential gene expression analysis  
93 identified 3,467 genes upregulated in recurrent tumor cells, and 3,920 genes upregulated in primary tumor  
94 cells (P-value adj. <0.05) (**Figure 1E**). These gene expression changes were strongly correlated with alterations

95 in histone modifications at the gene promoters (**Figure S1F**). Taken together, these results show that recurrent  
96 tumors exhibit genome-wide transcriptional changes that are associated with epigenetic rewiring.

97 To identify specific transcriptional programs altered in recurrent tumors, we performed Gene Set  
98 Enrichment Analysis (GSEA). Recurrent tumors were highly enriched for an epithelial-to-mesenchymal  
99 transition (EMT), as we and others have previously described (Mabe et al., 2018; Moody et al., 2005), as well  
100 as two independent Myc signatures (**Figure 1F**). Interestingly, a recent study in triple-negative breast cancer  
101 reported that EMT and Myc signatures are enriched in drug-resistant breast cancers (Kim et al., 2018). A  
102 number of genes found in the chemoresistant gene set were also upregulated in recurrent tumors, including  
103 *Coll1a1*, *Myc*, *Psat1*, *Cox6c*, and *Gastp1*.

104 Further analysis of ChIP-seq data revealed that a substantial proportion of genes in both primary and  
105 recurrent tumor cells had bivalent promoters, marked by both the repressive histone mark H3K27me3 and the  
106 active histone mark H3K4me3 (**Figure S1G**). Alterations in the expression of genes with bivalent promoters  
107 has been implicated in chemoresistance and enhanced breast cancer tumorigenicity (Chaffer et al., 2013;  
108 Chapman-Rothe et al., 2013). Consistent with this, we found a number of genes that were silenced through  
109 bivalent histone modifications in primary tumors and transcriptionally activated in recurrent tumors, including  
110 *Mycn*, *Prrx2*, *Twist2*, and *Zeb1*. Conversely, we identified two pro-apoptotic proteins, *Bik* and *Pawr*, that were  
111 expressed in primary tumors and silenced by bivalent regulation in recurrent tumors (**Figure S1G**). Taken  
112 together, combined RNA- and ChIP-sequencing analyses indicate that tumor recurrence is associated with  
113 extensive epigenetic and transcriptional alterations.

114

#### 115 *Recurrent Tumor Cells are Dependent on G9a Methyltransferase Activity*

116 In light of the reported links between epigenetic remodeling and drug resistance (Knoechel et al., 2014;  
117 Sharma et al., 2010), we hypothesized that epigenetic remodeling may be functionally important for the  
118 survival and recurrence of tumor cells following oncogene withdrawal. Specifically, we reasoned that tumor  
119 cells that persist following oncogene withdrawal may acquire unique epigenetic dependencies that are not  
120 present in the primary tumors. To explore this hypothesis, we carried out a small-molecule screen testing the

121 effect of inhibitors targeting various epigenetic enzymes on primary and recurrent tumor cell viability (**Table**  
122 **S1**). Two primary (primary #1 and primary #2) and two recurrent (recurrent #1 and recurrent #2) tumor cell  
123 lines were treated with increasing doses of each inhibitor and cell viability was measured (**Figure 2A**). To  
124 identify drugs that differentially inhibit the growth of primary and recurrent tumor cells, we calculated the  
125 difference in  $IC_{50}$  for primary and recurrent tumor cells for each drug; values less than 0 correspond to drugs  
126 more potent against recurrent tumor cells. This analysis identified two drugs that were significantly more  
127 potent in recurrent cells, the G9a inhibitor BIX-01294 ( $IC_{50}$  difference=-0.88 [95% CI, -1.23 - -0.543]) and the  
128 Aurora kinase inhibitor lestaurtinib ( $IC_{50}$  difference= -1.06 [95% CI, -1.47 - -0.665) (**Figure 2B**). No drugs  
129 were significantly more potent against primary tumor cells (**Figure 2B**). Because we could not calculate an  
130  $IC_{50}$  for nine compounds, we also evaluated the difference in maximal drug efficacy for each inhibitor between  
131 primary and recurrent cells (**Figure 2C**). Six drugs were significantly more efficacious in recurrent tumor cell  
132 lines (adj.  $P$ -value <0.05), including a G9a inhibitor (BIX-01294), a JMJD3 inhibitor (GSKJ1), an EZH2  
133 inhibitor (EPZ5687), a DOT1L inhibitor (SGC0946), an LSD1 inhibitor (GSKLSD1), and a BAZ2A/B  
134 inhibitor (GSK2801) (**Figure 2C**). No inhibitors were significantly more efficacious in primary tumor cell  
135 lines (**Figure 2C**).

136 We focused on the G9a inhibitor BIX-01294, as it was among the most potent and efficacious inhibitors  
137 in recurrent tumor cells as compared to primary tumor cells. G9a is a histone methyltransferase that  
138 heterodimerizes with the structurally related G9a-like protein (GLP) to catalyze mono- and dimethylation of  
139 H3K9 (Jenuwein, 2006; Jenuwein et al., 1998; Tachibana et al., 2005). H3K9me1 and H3K9me2 are associated  
140 with transcriptional silencing of genes in euchromatin, while H3K9me3 – which is deposited by Setdb1 or  
141 Suv39H1 – is associated with repressed genes in heterochromatin (Rice et al., 2003; Schultz et al., 2002; Wang  
142 et al., 2003). BIX-01294 inhibits G9a/GLP by competing for binding with the amino acids N-terminal of the  
143 substrate lysine residue (Chang et al., 2009). We first confirmed that BIX-01294 selectively inhibits recurrent  
144 tumor cell growth by additional cell viability assays (**Figure 2D and E**). At high concentrations (> 4  $\mu$ M),  
145 BIX-01294 also inhibits growth of primary tumor cells, possibly due to off-target effects (Kubicek et al., 2007).  
146 Therefore, we tested whether recurrent tumor cells are differentially sensitive to additional G9a inhibitors.



147 Both UNC0638, a substrate-competitive inhibitor (**Figure 2F**), and BRD4770, an S-adenosylmethionine  
148 (SAM)-competitive inhibitor (**Figure 2G**), selectively inhibited the growth of recurrent tumor cells.

149 We next asked whether BIX-01294 inhibits H3K9 methylation equivalently between primary and  
150 recurrent tumor cells. BIX-01294 led to a 68-86% reduction in H3K9me2 levels in primary and recurrent  
151 tumor cells (**Figure S2A**), similar to the reduction in bulk H3K9me2 levels that has previously been reported  
152 with BIX-01294 (Vedadi et al., 2011). Furthermore, H3K9me2 reductions are seen particularly at the 300 nM  
153 and 1  $\mu$ M concentrations (**Figure S2B and C**), which is in line with the IC<sub>50</sub> values observed in recurrent  
154 tumor cells.

155 To assess whether the effect of G9a inhibitors on recurrent cell viability was mediated through on-  
156 target inhibition of G9a, we used CRISPR-Cas9 to knock out G9a in primary and recurrent tumor cell lines.  
157 Cells were infected with lentivirus expressing a control sgRNA targeting the Rosa26 locus (sgNT), or one of  
158 two independent sgRNAs targeting G9a (sgG9a) (**Figure 2H**). G9a knockout significantly inhibited the growth  
159 of recurrent tumor cell lines, while primary tumor cells lines were unaffected (**Figure 2I**), providing genetic  
160 confirmation that recurrent tumor cells are dependent on G9a activity.

161 Finally, we asked whether Met-amplified recurrent tumors were also sensitive to G9a inhibitors. To  
162 address this, we tested the effect of BIX treatment on an expanded panel of 3 primary tumor cell lines and 5  
163 recurrent tumor cell lines. While the growth of all non-Met amplified recurrent cell lines was inhibited by BIX,  
164 neither of the two Met-amplified cell lines (#4 and #5) was sensitive to BIX (**Figures S2D and E**), indicating  
165 that Met-amplified tumors are not dependent upon G9a activity. Taken together, these results suggest that a  
166 subset of recurrent tumors acquire a dependence upon G9a methyltransferase activity.

167

### 168 *G9a Promotes Tumor Recurrence in Vivo*

169 Having established that recurrent tumors are dependent upon G9a activity, we next asked whether G9a  
170 expression is altered in recurrent tumors. We measured G9a expression in an independent cohort of 7 primary  
171 and 7 recurrent MTB;TAN tumors. G9a has a long isoform (G9a long) and a short isoform (G9a short)  
172 generated by alternative splicing. There was a trend toward increase expression of the short isoform recurrent

173 tumors (**Figure 3A**), and in recurrent tumor cell lines (**Figure 3B**). Intriguingly, mRNA levels of G9a were  
174 not increased in recurrent tumors or recurrent tumor cells (**Figures S2F and G**), suggesting that increased G9a  
175 protein expression is not mediated through increased transcript levels.

176 The observation that recurrent tumors upregulate G9a and are dependent upon G9a activity suggested  
177 that G9a may promote the development of recurrent tumors. To test this directly, we used an orthotopic  
178 recurrence assay to determine whether G9a knockout in primary tumors affects the latency of tumor recurrence.  
179 Control or G9a-knockout cells were injected into the inguinal mammary gland of nude mice on dox to generate  
180 primary tumors. Primary tumors from control and G9a knockout cells formed with similar kinetics (**Figure**  
181 **3C and S2H**) and primary tumors maintained G9a knockout (**Figure 3D**), consistent with our findings that  
182 G9a knockout does not affect primary tumor cell growth *in vitro*. Once primary tumors reached  $\sim 75\text{mm}^3$ , dox  
183 was withdrawn to induce Her2 withdrawal and tumor regression, and mice were monitored for the formation  
184 of recurrent tumors. G9a knockout significantly delayed the time to recurrence ( $P=0.0006$ , HR=0.02 (CI: 0.08-  
185 0.50) for sgG9a#1;  $P<0.0001$ , HR=0.06 (CI: 0.02-0.16) for sgG9a#2) (**Figure 3E**). Interestingly, many  
186 recurrent tumors maintained G9a knockout (**Figure S2I**), suggesting that these tumors had bypassed the  
187 requirement for G9a activity. Given that Met-amplified are not sensitive to G9a inhibition, we considered Met  
188 amplification as one potential bypass mechanism. Indeed, we found that a greater proportion of G9a knockout  
189 recurrent tumors had amplified Met as compared to control recurrent tumors (**Figure S2J**), though this did not  
190 reach statistical significance, likely due to the small sample size. Taken together, these data show that G9a  
191 promotes tumor recurrence following Her2 downregulation.

192 Next, we evaluated whether pharmacologic inhibition of G9a can inhibit the growth of existing tumors  
193 *in vivo*. Recurrent or primary tumor cells were injected orthotopically into the inguinal mammary glands of  
194 FVB mice to generate orthotopic tumors, and mice were treated with BIX-01294 (10 mg/kg, IP) three times  
195 weekly for two weeks. Consistent with *in vitro* data, BIX administration significantly reduced tumor growth  
196 and tumor burden in recurrent tumor cells (**Figures 3F and G**). In contrast, primary tumor growth was not  
197 inhibited by BIX-01294 treatment, and in fact BIX-treated primary tumors grew slightly faster than control  
198 tumors (**Figures 3H and I**). BIX treatment also slowed the growth of orthotopic recurrent tumors in athymic

199 nude recipients (**Figure S2K**), suggesting that the effects of G9a inhibition do not require an adaptive immune  
200 system.

201 Finally, we asked whether overexpression of G9a in primary tumors could accelerate tumor recurrence.  
202 Primary tumor cells were transduced with a retrovirus expressing G9a or empty vector (**Figure S2L**) and  
203 orthotopically injected into mice. Control and G9a-expressing primary tumors formed with similar kinetics  
204 (data not shown). Dox was withdrawn to induce Her2 downregulation and tumor regression, and mice were  
205 monitored for the formation of recurrent tumors. G9a expression significantly accelerated the formation of  
206 recurrent tumors (**Figure 3J**), further indicating that G9a promotes tumor recurrence following Her2  
207 downregulation.

208

#### 209 *Integrated Epigenetic and Transcriptional Analysis of G9a-regulated Genes in Recurrent Tumors*

210 We next explored the mechanistic basis for the dependence of recurrent tumors on G9a activity by  
211 identifying genes whose expression is directly regulated by G9a specifically in recurrent tumor cells. To do  
212 this, we first performed RNA-seq on primary and recurrent tumor cells treated with BIX-01294 for 16 hours.  
213 Importantly, this early time-point precedes the induction of cell death in response to BIX-01294 treatment.  
214 Because Met-amplified recurrent tumors were not sensitive to G9a inhibition, we focused on gene expression  
215 changes induced by G9a inhibition in non-Met amplified recurrent tumor cells.

216 G9a inhibition led to only modest changes in gene expression in primary tumor cells (**Figure 4A and**  
217 **Table S2**). In contrast, G9a inhibition induced widespread changes in gene expression in recurrent tumor cells  
218 (**Figure 4A**). We examined genes that were more significantly altered by BIX treatment in recurrent tumor  
219 cells as compared to primary tumor cells. 306 genes were differentially upregulated following BIX treatment  
220 in recurrent tumor cells, and 137 genes were differentially downregulated following BIX treatment (**Figure**  
221 **4A**). Among the differentially upregulated genes were genes known to induce cell cycle arrest and cell death,  
222 including p21, Gadd45a, and Ccng2 (**Figure 4B and Figure S3A**). Importantly, the majority of genes whose  
223 expression changed following G9a inhibition were upregulated, consistent with G9a's role in repressing genes  
224 through H3K9 methylation.

225 We next overlapped genes upregulated following G9a inhibition in recurrent tumor cells with H3K9  
226 ChIP-seq data to generate a list of genes likely to be directly regulated by G9a through H3K9 methylation.  
227 G9a can regulate gene expression by depositing one or two methyl groups on H3K9 (Jenuwein, 2006; Jenuwein  
228 et al., 1998), and H3K9me2 can subsequently be converted to H3K9me3 by other SET domain-containing  
229 methyltransferases, including Setdb1 and Suv39H1 (Rice et al., 2003; Schultz et al., 2002; Wang et al., 2003).  
230 Because we were unable to successfully perform ChIP-sequencing to identify H3K9me2 peaks (data not  
231 shown), we considered a reduction in H3K9 acetylation in recurrent tumor cells as a proxy for increased H3K9  
232 methylation. We identified 342 genes that (i) had lower H3K9 acetylation in recurrent tumor cells as compared  
233 to primary tumor cells, and (ii) were upregulated following G9a inhibition specifically in recurrent tumor cells  
234 (**Figure 4C** and **Table S3**). We used ChIP-qPCR to assess H3K9me2 levels at the promoter of 10 of these  
235 putative G9a target genes, and found that 9/10 genes had elevated levels of H3K9me2 in recurrent tumor cells,  
236 suggesting that lack of H3K9ac is a suitable surrogate for H3K9 methylation (**Figure S3B**). We hypothesized  
237 that these 342 genes represent putative direct targets of G9a in recurrent tumor cells whose re-expression may  
238 mediate cell death following G9a inhibition. Interestingly, this G9a-regulated gene set is correlated with  
239 increased risk of distant recurrence in human cancers, particularly among HER2-enriched and Luminal B  
240 breast tumors (**Figure 4D**) (Ringner et al., 2011).

241 Gene ontology analysis revealed that these G9a targets are enriched for genes involved in regulation  
242 of inflammatory responses, cytokine production, and tumor necrosis factor (TNF) signaling (**Figure 4E**).  
243 Examination of specific genes revealed that the pro-inflammatory cytokines TNF, IL-23a, and Cxcl2 were all  
244 induced following G9a inhibition in recurrent tumor cells (**Figure S3C-E**). Consistent with this, Gene Set  
245 Enrichment Analysis (GSEA) showed enrichment of a TNF-NF $\kappa$ B signature and an inflammatory response  
246 signature in recurrent cells treated with BIX-01294 (**Figures 4F and G**). Taken together, these results indicate  
247 that G9a directly represses an inflammatory gene expression program in recurrent tumor cells, and raise the  
248 possibility that upregulation of pro-inflammatory genes may contribute to cell death in recurrent tumor cells  
249 following G9a inhibition.

250 Given that G9a inhibition induces expression of pro-inflammatory genes in recurrent tumor cells, we  
251 examined whether G9a inhibition is associated with alterations in the tumor immune microenvironment. To  
252 evaluate this, we performed immune cell profiling on recurrent and primary orthotopic tumors treated with  
253 BIX-01294 (see **Figures 3F and H**) using markers for leukocytes, monocytes, macrophages, and T-cells. G9a  
254 inhibition did not significantly alter any of the immune cell populations in recurrent (**Figure S3F**) or primary  
255 tumors (**data not shown**). While these results do not rule out the possibility that G9a inhibition affects the  
256 tumor immune microenvironment, they do suggest that G9a inhibition slows the growth of recurrent tumors  
257 through tumor cell-intrinsic pathways. This is consistent with the observation that BIX treatment inhibits  
258 recurrent tumor cell growth in vitro (see Figure 2) and in immunocompromised mice (see Figure S2K and L).

259

#### 260 *G9a-dependent Silencing of TNF is Required for Recurrent Tumor Cell Survival*

261 To investigate whether upregulation of pro-inflammatory cytokines contributes to cell death following  
262 G9a inhibition, we focused our attention on TNF. TNF was among the most differentially induced cytokines  
263 following BIX-01294 treatment in recurrent versus primary tumor cells, and the TNF promoter had reduced  
264 H3K9 acetylation in recurrent as compared to primary tumor cells (**Figure 5A**). Further, G9a has been reported  
265 to regulate TNF in other models (Li et al., 2018). TNF is a pleiotropic cytokine that has both pro- and anti-  
266 tumor effects, depending on the cellular context (Rokhlin et al., 2000). TNF can induce tumor cell-specific cell  
267 death in certain cancer cell types and lineages, including breast cancer (Burow et al., 1998; Wang and Lin,  
268 2008). We first tested whether G9a regulates TNF through H3K9 methylation in our model. At baseline, TNF  
269 expression was slightly lower in recurrent tumor cells as compared to primary tumor cells (**Figure S3A**). G9a  
270 inhibition led to a 4- to 50-fold increase in TNF levels in recurrent cells, but only induced modest changes in  
271 TNF levels in primary cells, as measured by qRT-PCR (**Figure 5B**). Further, H3K9me2 levels at the TNF  
272 promoter were significantly higher in recurrent tumor cells as compared to primary tumor cells (**Figure 5C**),  
273 and were reduced following BIX-01294 treatment (**Figure 5D**), confirming that G9a promotes H3K9  
274 methylation at the TNF promoter. We next asked whether TNF selectively inhibits recurrent tumor cell growth.  
275 Treatment with recombinant TNF led to a marked decrease in the growth of recurrent tumor cells, but had only

276 a modest effect on primary tumor cells (**Figure 5E**). Similar results were obtained in long-term colony  
277 formation assays (**Figure 5F**). Taken together, these results demonstrate that G9a directly silences pro-  
278 inflammatory cytokines, including TNF, in recurrent tumor cells, and that re-activation of these genes mediates  
279 the anti-tumor effects of G9a inhibition in recurrent tumors.

280

### 281 *G9a Inhibition Leads to Induction of p53 Targets and p53-dependent Cell Death*

282 RNA-seq analysis revealed that a p53 signature was enriched following G9a inhibition (**Figure S4A**).  
283 It has been previously described that BIX-01294 mediates cell death in human cancer cell lines through a p53-  
284 dependent mechanism (Fan et al., 2015). Furthermore, p53 plays a crucial role in TNF-mediated cell death  
285 (Pastor et al., 2010). Given these reports, we hypothesized that p53 may be required for cell death following  
286 G9a inhibition in recurrent tumor cells. We first confirmed that p53 was expressed and not mutated in recurrent  
287 tumor cells. Western blot analysis showed that p53 protein is expressed in all primary and recurrent tumor cell  
288 lines (**Figure S4B**). Also, sequencing of p53 identified no mutations in either primary or recurrent tumor cell  
289 lines (data not shown). We next confirmed that p53 targets were upregulated following treatment with BIX-  
290 01294. qPCR analysis showed that the canonical p53 targets Cdkn1a (p21) and Gadd45a were significantly  
291 upregulated in BIX-treated recurrent tumor cell lines (**Figure S4C**). Together, these data suggest that the p53  
292 signaling axis is intact in recurrent tumor cells and that p53 targets genes are upregulated in response to G9a  
293 inhibitors.

294 To determine whether p53 is required to mediate cell death in response to G9a inhibition, we knocked  
295 out p53 in recurrent tumor cell lines using CRISPR/Cas9 (**Figure S4D**). p53 knockout markedly reduced the  
296 induction of p21 and Gadd45a following BIX treatment in recurrent tumor cell lines (**Figure S4E**).  
297 Surprisingly, the induction of p21 and Gadd45a was not completely reduced following p53 knockdown,  
298 suggesting that G9a may regulate expression of these genes in part through p53-independent mechanisms,  
299 potentially through methylation of H3K9. Significantly, p53 knockout resulted in an approximately 3-fold shift  
300 in the potency of BIX-01294 in recurrent tumor cell line #1 (IC<sub>50</sub> for sgNT 168 nM [95% CI: 102 nM – 273  
301 nM]; IC<sub>50</sub> for sgp53 613 nM [95% CI: 345 nM – 996 nM]) and an approximately 2-fold shift in recurrent cell

302 lines #2 (IC<sub>50</sub> for sgNT 120 nM [95% CI: 79 nM – 182 nM]; IC<sub>50</sub> for sgp53 248 nM [95% CI: 159 nM – 386  
303 nM]) and #3 (IC<sub>50</sub> for sgNT 476 nM [95% CI: 304 nM – 745 nM]; IC<sub>50</sub> for sgp53 867 nM [95% CI: 535 nM –  
304 1.4 μM]) (**Figure S4F**). Consistent with this, Annexin V staining showed that p53 knockout partially decreased  
305 cell death following BIX-01294 treatment (**Figure S4G**). Taken together, these results indicate that p53  
306 partially contributes to cell death following G9a inhibition, suggesting the presence of both p53-dependent and  
307 -independent cell death pathways.

308

### 309 *G9a Inhibition Induces Necroptotic Cell Death*

310 The results described above indicate that G9a inhibition leads to upregulation of pro-inflammatory  
311 cytokines, and one such cytokine, TNF, is sufficient to reduce cell viability in recurrent cells. Because TNF  
312 can induce both apoptotic and necroptotic cell death pathways (Laster et al., 1988; Nikolettou et al., 2013),  
313 we next sought to define the mode of cell death following G9a inhibition. G9a inhibition led to a marked  
314 increase in Annexin V staining only in recurrent tumor cells (**Figure 6A-B**). Annexin V binds to  
315 phosphatidylserine (PS) on the outer leaflet of the plasma membrane. PS flipping is a marker of both apoptosis  
316 and necroptosis, and so to differentiate between these cell death pathways we examined molecular markers  
317 specific for each cell death pathway. Surprisingly, the apoptotic markers cleaved caspase-3 and cleaved PARP  
318 were not induced following BIX-01294 treatment (**Figure 6C**). Instead, BIX-01294 treatment led to a marked  
319 increase in phosphorylation of S345 of MLKL (**Figure 6C**), which is a marker of necroptosis and is associated  
320 with induction of necroptosis during TNF-mediated cell death (Rodriguez et al., 2016). Consistent with this,  
321 we found that a necroptosis gene expression signature containing 141 necroptosis-associated genes (**Table S4**)  
322 (Callow et al., 2018; Chen et al., 2018a; Hitomi et al., 2008; Zhu et al., 2018) was enriched following G9a  
323 inhibition in recurrent tumor cells (**Figure 6D**). These results indicate that G9a inhibition leads to necroptotic  
324 cell death in recurrent tumor cells.

325 To evaluate whether induction of necroptosis is necessary for BIX-mediated cell death, we pre-treated  
326 recurrent tumor cell lines with the RIPK1 inhibitor Necrostatin-1 (Nec-1). Nec-1 partially rescued cell viability  
327 following BIX treatment in three recurrent tumor cell lines (**Figure 6E**). Consistent with this rescue of cell

328 viability, Nec-1 also decreased the proportion of Annexin V-positive cells following BIX-01294 (**Figure 6F**).  
329 Taken together, these results indicate that G9a inhibition induces necroptotic-dependent cell death in recurrent  
330 tumor cells.

331 In light of our previous observation that p53 contributes to cell death following G9a inhibition, we next  
332 addressed the role of p53 in BIX-induced necroptosis. p53 has been suggested to contribute to necroptosis  
333 through indirect upregulation of the critical necroptosis intermediates RIPK1, RIPK3 and cathepsins (Tu et al.,  
334 2009; Wang et al., 2016). To address this possibility, we compared the induction of necroptosis following G9a  
335 inhibition in control and p53 knockout cells. p53 knockout cells failed to induce MLKL phosphorylation  
336 following BIX-01294 treatment (**Figure 6G**). Consistent with this, qPCR analysis indicated that TNF  
337 upregulation was blunted in p53 knockout cells treated with BIX, suggesting that p53 activity is required for  
338 TNF expression (**Figure S4H**). Taken together, our data suggest that p53 is required for TNF-dependent  
339 necroptosis in recurrent tumor cells.

340

#### 341 *Recurrent Tumor Cells are Dependent on RIPK3*

342 Our findings to this point demonstrated that G9a inhibition induces inflammatory cytokine expression,  
343 leading to p53-dependent necroptosis. Paradoxically, primary tumor cell lines demonstrated similar p53  
344 expression as recurrent tumor cell lines, but tolerated exogenous TNF. Therefore, we postulated that recurrent  
345 tumor cells acquire an enhanced sensitivity to necroptosis in response to exogenous stimuli that is lacking in  
346 primary tumor cells.

347 To address this question, we evaluated the expression of critical intermediates in the necroptosis  
348 pathway. Necroptosis is triggered through a multiprotein complex called the necrosome consisting of RIPK1  
349 and RIPK3 (Newton, 2015), which acts to phosphorylate and activate MLKL, ultimately leading to cell  
350 membrane disruption and necroptosis (Weinlich et al., 2017). Conversely, caspase-8 can inhibit necroptosis at  
351 least in part through cleaving RIPK1 and RIPK3 (O'Donnell et al., 2011). To understand why recurrent tumors  
352 have heightened sensitivity to necroptosis, we examined expression of RIPK1, RIPK3, caspase-8 and MLKL  
353 in primary and recurrent tumor cells (**Figure 7A and Figures S5A-C**). RNA sequencing revealed that RIPK1



354 and MLKL were expressed at similar levels between primary and recurrent tumor cells (**Figures S5B and C**).  
355 In contrast, we observed a 2-fold decrease in caspase-8 expression and a nearly 1000-fold increase in RIPK3  
356 expression in recurrent tumor cells (**Figure 7A and Figure S5A**). qPCR and Western blotting confirmed that  
357 RIPK3 was dramatically upregulated in recurrent tumor cells relative to primary tumor cells (**Figure 7B and**  
358 **C**). Intriguingly, Met-amplified recurrent tumor cell lines did not upregulate RIPK3, consistent with the finding  
359 that these cells are resistant to G9a inhibition (**Figure 7B and C**). To test whether RIPK3 is sufficient to induce  
360 sensitivity to TNF-induced necroptosis, we engineered primary tumor cells expressing RIPK3. RIPK3  
361 expression in primary tumor cells increased their sensitivity to TNF-induced cell death (**Figure S5D-E**). These  
362 results suggest that upregulation of RIPK3 in recurrent tumor cells underlies, at least in part, their sensitivity  
363 to both G9a inhibition and TNF treatment.

364 RIPK3 is traditionally thought to function as a tumor suppressor (Vucur et al., 2013). Consistent with  
365 this, RIPK3 expression is silenced in >85% of breast cancer patients (Koo et al., 2015). In contrast to its tumor  
366 suppressive function, several recent reports have suggested that RIPK3 may drive tumor growth (Hanggi et  
367 al., 2017; Liu et al., 2016; Seifert et al., 2016). Given that RIPK3 is highly expressed in recurrent and not  
368 primary tumor cells, we hypothesized that recurrent tumor cells may depend on RIPK3 activity. To test this  
369 hypothesis, we tested the effect of pharmacologic inhibition of RIPK3 on tumor cell growth; inhibitors against  
370 RIPK1 and MLKL were included as controls. Whereas the RIPK1 inhibitor Nec-1 and the MLKL inhibitor  
371 NSA had minimal effects on recurrent tumor cell viability, the RIPK3 inhibitor GSK'872 profoundly inhibited  
372 recurrent tumor cell viability in two cell lines (**Figure 7D-F**). Further, all three recurrent cell lines exhibited  
373 decreased cell viability in response to genetic knockdown of RIPK3 with two independent shRNAs (**Figure**  
374 **7G and Figure S5F**). Taken together, these data suggest that elevated RIPK3 expression promotes recurrent  
375 tumor cell growth, and that this can be pharmacologically targeted.

376 Finally, we investigated whether G9a also regulates cell viability and inflammatory cytokine  
377 expression in human breast cancer cell lines. To address this, we measured the response of 24 breast cancer  
378 cell lines to increasing concentrations of BIX-01294; the normal mammary epithelial cell line MCF10A was  
379 included as a control (**Figure S5G and H**). Only SKBR3 cells had an IC<sub>50</sub> for BIX below 1  $\mu$ M, consistent

380 with previous reports that SKBR3 cells are sensitive to G9a inhibition (**Figure S5G and H**)(Kim et al., 2013).  
381 Similar to recurrent mouse tumors, SKBR3 cells had elevated expression of RIPK3 as compared to MCF7 and  
382 MCF10A cell lines, both of which are resistant to G9a inhibition (**Figure S5I**). Further, BIX treatment induced  
383 robust expression of TNF in multiple breast cancer cell lines (**Figure S5J**). These data suggest that G9a can  
384 regulate TNF expression in a range of human breast cancer cell lines.

## 385 **Discussion**

386           The development of targeted therapies against Her2 has been a major advance in the treatment of Her2-  
387 positive cancers. However, a fraction of Her2-positive tumors treated with adjuvant therapies will eventually  
388 recur, representing one of the largest hurdles to obtaining cures in breast cancer (Haque et al., 2012; Sparano  
389 et al., 2015). Many Her2-positive tumors become Her2-negative or refractory to anti-Her2 therapies upon  
390 relapse, suggesting that these tumors have acquired dependence upon alternative pathways for their growth  
391 (Hurley et al., 2006; Mittendorf et al., 2009). In the current study, we used a genetically engineered mouse  
392 model of Her2-driven breast cancer to examine mechanisms underlying Her2-independent tumor recurrence.  
393 We found that a subset of recurrent tumors underwent widespread epigenetic reprogramming and displayed  
394 profound changes in gene expression as compared to primary tumors. These epigenetic changes were  
395 associated with an acquired dependency of recurrent tumors on the histone methyltransferase G9a. Genetic  
396 knockout of G9a delayed tumor recurrence, and pharmacologic inhibition of G9a prevented the growth of  
397 recurrent tumors. Mechanistically, G9a was required in recurrent tumors for the silencing of pro-inflammatory  
398 genes. Inhibition of G9a led to the re-expression of pro-inflammatory genes and the induction of necroptotic  
399 cell death. Surprisingly, recurrent tumors had dramatically upregulated expression of the essential necroptosis  
400 protein RIPK3. RIPK3 activity was both required for recurrent tumor cell growth and sensitized recurrent  
401 tumor cells to necroptosis. Taken together, we found that G9a-dependent epigenetic reprogramming promotes  
402 breast cancer recurrence, and identified a G9a-RIPK3 pathway as a targetable collateral vulnerability in  
403 recurrent breast cancer (**Figure 7H**).

404           RNA-seq and ChIP-seq analysis revealed that recurrent tumors had profound transcriptional and  
405 epigenetic differences from primary tumors. Results from an epigenetic inhibitor screen suggested that  
406 recurrent tumors had acquired novel epigenetic dependencies as compared to primary tumors. Together, this  
407 strongly suggests that epigenetic remodeling is functionally important for tumor recurrence. Indeed, inhibition  
408 of G9a delayed tumor recurrence and slowed recurrent tumor growth. While the results presented here focus  
409 on G9a, it is possible that other chromatin-modifying enzymes are also functionally important for tumor  
410 recurrence. Consistent with this, we found that recurrent tumor cells had acquired novel H3K9ac, H3K4me3

411 and RNAPol2 peaks at intergenic regions. Although the mechanisms underlying these epigenetic changes  
412 remain unknown, our results suggest that epigenetic remodeling is a major feature of tumor recurrence, and  
413 this remodeling is associated with an acquired dependence on the G9a histone methyltransferase. While our  
414 study focused on how G9a regulates gene expression through alterations in histone methylation, it is important  
415 to note that G9a has non-histone substrates, including p53 (see below), Reptin (Lee et al., 2010), and Pontin  
416 (Lee et al., 2011). G9a regulation of these pathways through direct methylation could underlie, at least in part,  
417 the dependence of recurrent tumors on G9a activity.

418 By integrating global gene expression and ChIP-seq data, we found that G9a directly regulates the  
419 expression of a set of pro-inflammatory genes, including TNF, in recurrent tumor cells. We found that  
420 treatment with TNF by itself was sufficient to inhibit the growth of recurrent, but not primary, tumor cells.  
421 Mechanistically, the selective sensitivity of recurrent tumor cells to TNF was due to the fact that recurrent  
422 tumor cells had upregulated the essential necroptosis kinase RIPK3. Expression of RIPK3 sensitized primary  
423 tumor cells to TNF-induced cell death, while blocking necroptosis partially reversed recurrent tumor cell death  
424 in response to G9a inhibition. RIPK3 is traditionally thought to function as a tumor suppressor, and its  
425 expression is often silenced in breast cancers (Koo et al., 2015), and so its upregulation in recurrent tumors  
426 was unexpected. However, a handful of recent reports have identified a pro-tumorigenic function for RIPK3  
427 that is independent of necroptosis (Newton, 2015; Seifert et al., 2016). Consistent with this, we found that  
428 RIPK3 was required for the growth of recurrent tumor cells. Taken together, this suggests a model where  
429 RIPK3 upregulation is both required for recurrent tumor cell growth and sensitizes these cells to stimuli that  
430 induce necroptosis, including TNF. According to this model, the dependence of recurrent tumors for G9a  
431 activity is due, at least in part, to the requirement for recurrent tumor cells to silence TNF expression. This is  
432 an example of the concept of collateral sensitivity, where a resistance pathway – in this case high RIPK3  
433 expression – results in enhanced sensitivity to a secondary pathway, G9a.

434 Our mechanistic studies suggested that the induction of necroptosis following G9a inhibition is  
435 partially dependent upon p53 activity. Other studies have shown that G9a inhibition induces p53-dependent  
436 autophagy (Fan et al., 2015), and G9a has been reported to repress p53 activity through direct methylation of

437 lysine 373 of human p53 (K370 in mice) (Huang et al., 2010). Our data suggest that p53 acts upstream of TNF  
438 expression, thereby modulating activation of necroptosis. However, the specific role of p53 in initiating  
439 necroptosis requires further investigation. It is possible that G9a inhibition directly activates p53 by relieving  
440 an inhibitory methylation on K370. Alternatively, G9a inhibition may indirectly activate p53 through an  
441 unidentified mechanism, for instance by causing replication stress, alterations to chromatin structure, or  
442 metabolic stress (Avgustinova et al., 2018; Puzio-Kuter, 2011; Tanikawa et al., 2012). Indeed, the upregulation  
443 of p21 and Gadd45a following G9a inhibition was not completely abrogated by p53 knockout, suggesting that  
444 G9a inhibition may cause replication stress independent of p53 (Avgustinova et al., 2018). Notwithstanding  
445 the specific mechanisms, our results show that p53 activity following G9a inhibition is required for TNF  
446 upregulation and necroptosis.

447 A number of previous studies have found that inhibitors targeting G9a (Casciello et al., 2017; Tu et al.,  
448 2018) or the H3K27 methyltransferase Ezh2 (Chen et al., 2018b; Gardner et al., 2017) are effective in various  
449 cancers, either alone or in combination with chemotherapy. However, more recent studies have suggested that  
450 the effects of epigenetic inhibitors can be more complex, and are likely to be context-dependent. For instance,  
451 two recent studies have shown that inhibition of G9a drives the formation of tumors with more aggressive,  
452 stem-like phenotypes (Avgustinova et al., 2018; Rowbotham et al., 2018). In the study by Avgustinova et al.,  
453 G9a knock out delayed the formation of carcinogen-induced skin tumors, but once G9a-knockout tumors  
454 formed they were more aggressive, with higher levels of genomic instability and more frequent p53 loss  
455 (Avgustinova et al., 2018). These results suggest that G9a can play context-dependent roles in regulating tumor  
456 progression, and underscore the importance of crosstalk between G9a and p53 in dictating the net result of  
457 G9a inhibition. Similarly, recent work in lung cancer showed that Ezh2 inhibition has anti-tumor effects in the  
458 short-term, but leads to induction of an inflammatory program – including TNF signaling – that ultimately  
459 promotes resistance to Ezh2 inhibitors (Serresi et al., 2018). The findings we present here suggest that G9a  
460 inhibition can similarly induce a pro-inflammatory program, but that this has anti-tumor rather than pro-tumor  
461 consequences. It is possible that high RIPK3 expression in recurrent tumors tilts that balance of TNF signaling  
462 toward necroptosis rather than NF $\kappa$ B-dependent cell survival, consistent with the dual roles of this pleiotropic

463 cytokine (Annibaldi and Meier, 2018). Alternatively, epigenetic inhibitors may blunt tumor growth in the  
464 short-term, but lead to microenvironmental changes that ultimately drive tumor progression. Future work will  
465 be required to further define the cellular and genetic contexts in which G9a inhibitors will prove effective.

466           In conclusion, our results demonstrate that tumor recurrence is associated with widespread epigenetic  
467 reprogramming and acquired dependence on the histone methyltransferase G9a. These findings elucidate a  
468 novel role for G9a in silencing pro-necroptotic inflammatory cytokines in cancer. Finally, these observations  
469 suggest that strategies designed to target G9a may have clinical utility to improve survival in patients diagnosed  
470 with recurrent breast cancer.

471 **Materials and Methods**

472

473 **Study Approval**

474 Animal care and all animal experiments were performed with the approval of and in accordance with  
475 Duke University IACUC guidelines (A199-17-08).

476

477 **Mice**

478 MMTV-rtTA;TetO-Her2/neu (MTB;TAN) and TetO-Her2/neu (TAN) mice are on an FVB  
479 background. Wild-type FVB mice were purchased from Jackson laboratory. Mice were fed a standard chow  
480 diet and housed under barrier conditions with 12-hour light/dark cycles.

481

482 **Tissue culture**

483 Primary and recurrent tumor cell lines were derived and grown as previously described (Alvarez et al.,  
484 2013; Mabe et al., 2018). All human cell lines were obtained from Duke University Cell Culture Facility and  
485 cultured according to ATCC recommendations. Cell lines were authenticated and tested for mycoplasma  
486 according to standard procedures at Duke. Cell lines were used within 6 months of receipt.

487 The following drugs were purchased and utilized as part of the CaymanChem epigenetics screening  
488 library (#11076): Cl-Amidine, PFI-1, JQ1, GSK2801, SGC0946, N-oxalylglycine, OTX015, JIB01, RG108,  
489 Rucaparib, GSKJ1, UNC1215, lestaurtinib, BIX-01294, EPZ5687, GSKLSD1, PFI2, Lomeguatrib, PFI3,  
490 C646, Daminozide, AGK2, SGCCBP. Additional drugs included, UNC-0638 (Tocris), BIX-01294 (Tocris),  
491 BRD4770 (SelleckChem), Necrostatin-1 (SelleckChem), GSK'872 (SelleckChem), necrosulfonamide  
492 (SelleckChem), and Z-VAD-FMK (SelleckChem). Drugs were solubilized per manufacturer recommendations  
493 and utilized at concentrations stated within the text. Matching vehicle controls were used for each experiment.

494

495 **Plasmids and viral transduction**

496 To knock out expression of G9a or p53, Cas9 was stably infected in cell lines using a lentiviral construct  
497 encoding lentiCas9-Blast (a gift from Feng Zhang, Addgene #52962). The single-guide RNAs targeting G9a  
498 and p53 listed in **Table S5** were cloned into lentiGuide-Puro (a gift from Feng Zhang, Addgene #52963). For  
499 knockdown of RIPK3, lentiviral shRNAs listed in **Table S5** were purchased from Dharmacon. For G9a  
500 overexpression, a cDNA encoding the long isoform of G9a was purchased from Dharmacon (clone  
501 ID:6822432) and cloned into the pBabe-Puro plasmid using the following primers: forward primer 5'-  
502 GTTAGGATCCATGGCGGCGGCGGGAGC-3', and reverse primer 5'-  
503 GTTAGAATTCTTAAGAGTCCTCAGGTGTTG-3'.

504 Retrovirus was produced by transfecting AmphoPhoenix packaging cells with the retroviral expression  
505 construct (National Gene Vector Repository). Lentivirus was produced by transfection of HEK293T cell line  
506 with psPAX2 (a gift from Didier Trono, Addgene #12260), pMDG.2 (a gift from Didier Trono, Addgene  
507 #12559) and the lentiviral expression construct. Sodium butyrate (1 mM) was added 24 and 48 hours after  
508 transfection to boost viral titers. Viral supernatant was collected 48 and 72 hours post-transfection, filtered and  
509 used to transduce target cells in the presence of 4 µg/mL polybrene (Sigma). Cells were selected in media  
510 containing puromycin (2 µg/mL for primary tumor cells; 4 µg/mL for recurrent tumor cells) and/or blasticidin  
511 (5 µg/mL).

512

### 513 **Small molecule screen**

514 Tumor cells from primary #1, primary #2, recurrent #1, and recurrent #2 were plated at 1,500 cells /  
515 well on 96-well plates and allowed overnight to attach. Cells were treated with 8 increasing concentrations  
516 (vehicle, 10 nM, 30 nM, 100 nM, 300 nM, 1 µM, 3 µM, 10 µM) of each drug in biological triplicate for 60  
517 hours. Each well was normalized to the average of vehicle-treated control wells corresponding to the cell line.  
518 Cell viability was determined using the CellTiterGlo kit (Promega) according to the manufacturer's  
519 instructions. The IC<sub>50</sub> and SEM were determined for each primary and recurrent cohort by combining all 6  
520 biological replicates. The difference in IC<sub>50</sub> and 95% confidence interval were determined by inputting



521 log[IC<sub>50</sub>] and SEM for each cohort into a web-based tool available at  
522 <https://www.graphpad.com/quickcalcs/errorProp1/?Format=SEM>.

523

## 524 **Cell growth and cell viability assays**

525 Concentration-response curves were determined by plating 1,000 cells from primary and recurrent  
526 tumor cell lines in triplicate on a 96-well plate. Cells were allowed to grow overnight prior to 48 hour treatment  
527 with increasing concentrations of the following drugs: BIX-01294, UNC0638, BRD4770, Nec-1, GSK'872,  
528 and Necrosulfonamide. Cell viability was measured by CellTiterGlo kit. A single IC<sub>50</sub> with standard error was  
529 calculated by nonlinear regression for each cohort and significance between cohorts determined by Student's  
530 unpaired t-test. Concentration-response curves were generated in GraphPad Prism 8 software.

531 Cell growth kinetics following G9a knockout in primary (#1 and #2) and recurrent (#1 and #2) tumor  
532 cells was determined by plating 1,000 cells in triplicate on a 96-well plate. Cell viability was determined using  
533 CellTiterGlo on days 1, 3, and 5 post-plating. Relative cell viability was determined by calculating the ratio of  
534 luminescence on days 3 and 5 as compared to day 1.

535 For crystal violet staining, primary or recurrent tumor cells were plated onto 6-well plates (60,000  
536 cells/well) and then treated with 2  $\mu$ M BIX-01294 for 48 hours. For measurement of cell viability following  
537 RIPK3 knockdown, tumor cells were infected with lentivirus expressing one of two shRNAs targeting RIPK3  
538 (shRipk#1 TRCN0000022534, shRIPK3#2 TRCN0000022538) and selected in puromycin. Four days after  
539 infection, 50,000 tumor cells were plated onto 10-cm plates and grown for 7-9 days until confluency. Plates  
540 were washed with PBS and stained with 0.5% crystal violet for 5 minutes. Excess crystal violet was rinsed  
541 with water and plates scanned.

542 For short-term cell viability following TNF administration, 1,000 cells from each primary (#1, #2, and  
543 #3) and recurrent (#1, #2, #3) tumor cell lines were plated in triplicate on 96-well plates and treated for 72  
544 hours with 10 ng/mL TNF (Biolegend) or 0.1% BSA vehicle control. Cell viability was determined using  
545 CellTiterGlo. Long-term colony formation assays were performed by plating 1,500 cells on 10-cm plates and  
546 treating with 10 ng/mL TNF or vehicle control for 7 days. Plates were washed with PBS and stained with 0.5%

547 crystal violet. Plates were analyzed on Li-Cor Odyssey®. For cell viability assays with necrostatin-1, 1,000  
548 tumor cells from recurrent (#1, #2, and #3) lines were plated in triplicate and treated for 16 hours with 300 nM  
549 BIX-01294 alone or in combination with 30 µM Necrostatin-1.

550

### 551 **Immunoblotting and qRT-PCR,**

552 Immunoblotting and qRT-PCR was performed as previously described (Mabe et al., 2018). For histone  
553 blots, histones were extracted from cell pellets by the protocol found at  
554 <https://www.abcam.com/protocols/histone-extraction-protocol-for-western-blot>. Primary antibodies used for  
555 immunoblotting and gene probes used for qRT-PCR are listed in **Table S5**.

556

### 557 **Copy Number Assay**

558 DNA was extracted using the Allprep kit (Qiagen) according to manufacturer instructions and diluted  
559 to 5 ng/µL. 7.5 µL master mix was generated for each well in the following ratios: 5 µL genotyping Taqman  
560 mix (ThermoFisher Scientific), 0.5 µL of each the Met and Tfrc copy number probes (**Table S5**), and 1.5 µL  
561 of water. 2.5 µL was added to master mix for a total of 10 µL reactions in each well. Samples were run on a  
562 CFX384 Real-Time PCR Detection System (BioRad). Met Ct values were normalized to Tfrc using  $\Delta\Delta C_t$  and  
563 compared to normal mouse DNA.

564

### 565 **In-cell western**

566 7,500 tumor cells (Primary #1, Primary #2, Recurrent #1 and Recurrent #2) were plated in duplicate  
567 on a black, clear-bottom 96-well plate. Cells were treated for 48 hours with increasing concentrations of BIX-  
568 01294 and then fixed with 3.7% formaldehyde for 20 minutes at room temperature, washed with PBS, and  
569 permeabilized with 0.1% Triton X-100 in PBS. Cells were blocked for one hour with a 3% goat serum, 1%  
570 BSA, 0.1% Triton X-100 solution, prior to overnight incubation of primary antibodies listed in **Table S5**.  
571 Secondary antibodies AlexaFluor® (ThermoFisher) 680 and IRDye®800 (Li-Cor) were diluted 1:2000 in  
572 PBST and were incubated on cells for one hour. Plates were imaged with a Li-Cor Odyssey® infrared imaging

573 system (Li-Cor Biosciences). Mean fluorescence of each well was analyzed in ImageStudio Lite software (Li-  
574 Cor) and the signal ratio determined by dividing the H3K9me2 signal by the Histone H3 signal.

575

## 576 **Flow Cytometry**

577 150,000 tumor cells (Prim #1, Prim #2, Rec #1 and Rec#3) were plated on 6-cm plates and treated for  
578 16 hours with 1  $\mu$ M BIX-01294 or vehicle control. To test the requirement for necroptosis, recurrent lines #1  
579 or #3 were plated in biological triplicate and treated with vehicle, or 750 nM BIX-01294 with or without 30  
580  $\mu$ M Necrostatin-1. After treatment, cells were trypsinized and washed with PBS. Cell pellets were resuspended  
581 into 100  $\mu$ L of Annexin-binding buffer (Life Technologies) containing 1:20 Annexin V-AlexaFluor 488 and  
582 propidium iodide (Sigma) and incubated for 20 minutes. Samples were diluted with 400  $\mu$ L of additional  
583 Annexin-binding buffer and passed through a 40  $\mu$ m filter. Samples were excited with a 488 nm laser and  
584 10,000 events were analyzed on a BD FACSCanto II flow cytometer. Data were analyzed using FlowJo  
585 software.

586

## 587 **Immune profiling**

588 Orthotopic tumors were manually chopped and digested in a buffer containing: EBSS media  
589 (ThermoFisher, #14155063), 1X collagenase (300 Units/mL) / hyaluronidase (100 Units/mL) (Stemcell  
590 Technologies, #07912), 2% FBS (Corning, #35010CV), 0.1 mg/mL gentamycin, and 1X penicillin (2000  
591 Units/mL) / streptomycin (2000 Units/mL) (Gibco, #15140-122) for 3 hours at 37°C. Tumors were washed  
592 twice with media, and then incubated in a digestion buffer of 5 Units/mL dispase (Stemcell Technologies,  
593 #07913) and 0.1 mg/mL DNase I (Worthington, #LS002006). Cell pellets were incubated in ACK lysis buffer  
594 for 5 minutes and rinsed twice in FACS buffer (BD Pharmingen, #554656). Tumor cells were strained through  
595 a 40 micron filter and resuspended to  $1 \times 10^7$  cells / mL in FACS staining buffer.  $1 \times 10^6$  of cells were blocked  
596 with 2  $\mu$ L of CD16/CD32 (Invitrogen, #14-0161-82) for 10 minutes on ice. The cells were then incubated for  
597 30 minutes with antibodies appropriate for cell panels of interest (leukocytes, macrophages, or T-cells) (**Table**

598 **S5).** Samples were rinsed twice with staining buffer prior to analysis on BD FACSCanto II flow cytometer and  
599 data were analyzed using FlowJo software.

600

### 601 **Orthotopic Recurrence Assays**

602 Nude mice were randomized into cages and maintained on 2 mg/mL doxycycline for two days prior to  
603 orthotopic injection.  $1 \times 10^6$  primary tumors cells (#2) expressing Cas9 and either sgNT, sgG9a#1, or sgG9a#2  
604 were injected bilaterally into the fourth mammary gland of nude mice (n=10 per sgRNA, n=30 mice total).  
605 Tumor size was determined by caliper measurement at least three times a week until tumors reached  $\sim 75 \text{ mm}^3$ .  
606 Two mice (n=4 tumors) were sacrificed with primary tumors for downstream biochemical analysis. The  
607 remaining 8 mice were removed from dox to initiate tumor regression. Mice were palpated at least three times  
608 a week to monitor for tumor recurrence ( $\sim 75 \text{ mm}^3$ ). Recurrence-free survival was determined using Kaplan-  
609 Meier survival analysis and differences in recurrence were assessed using the Mantel-Cox log-rank test.

610

### 611 **In vivo BIX administration**

612 200,000 recurrent tumor cells (line #3) or 500,000 primary tumor cells (line #2) were injected  
613 bilaterally into the inguinal (fourth) mammary gland of FVB or TAN mice, respectively. TAN mice are used  
614 as hosts for primary tumor cells because these mice are tolerized to the luciferase protein (data not shown).  
615 Mice were randomized to receive vehicle (n=5 mice) or BIX treatment (n=5 mice; 10 mg/kg) by intraperitoneal  
616 injections three times a week for two weeks starting one day after tumor cell injections. Tumors size was  
617 determined by caliper measurements daily until mouse sacrifice. Mice were sacrificed once tumors reached  
618  $\sim 250 \text{ mm}^3$ . Tumor volume was calculated using the equation  $((\pi \times \text{length} \times \text{width}^2) / 6)$ . Tumor growth curves  
619 were compared between treatment groups by repeated-measures, two-way ANOVA (time x treatment) and  
620 Sidak's multiple comparisons test. Tumor AUC was calculated using the equation  $[(\text{vol}_1 + \text{vol}_2) / 2] \times (\text{day}_2 -$   
621  $\text{day}_1)$ . Tumor burden was compared between treatment groups by unpaired Student's t-test.

622

### 623 **ChIP- and RNA-sequencing**

624 Chromatin immunoprecipitation was performed as previously described with antibodies and primers  
625 found in **Table S5** (Mabe et al., 2018). Complete RNA- and ChIP-sequencing data is available online using  
626 National Center for Biotechnology Information's Short Read Archive (SRA) under project accession number:  
627 PRJNA505839.

628

### 629 **Chip-Seq analysis**

630 Following immunoprecipitation, DNA was quantified using the fluorometric quantitation Qubit 2.0  
631 system (ThermoFisher Scientific) and fragment size confirmed with Agilent TapeStation. DNA libraries were  
632 prepared using Kapa BioSystem HyperPrep Library Kit for compatibility with Illumina sequencing. Unique  
633 indexes were added to each sample. Resulting libraries were cleaned using SPRI beads, quantified with Qubit  
634 2.0 and Agilent Bioanalyzer, and pooled into equimolar concentrations. Pools were sequenced on Illumina  
635 HiSeq 4000 sequencer with 50 bp single reads at a depth of ~55 million reads per sample. Fastq reads  
636 underwent strict quality control processing with the TrimGalore package to remove low quality bases and trim  
637 adaptor sequences. Reads passing quality control were mapped to mm10 version of the mouse genome using  
638 the Bowtie short read aligner (Langmead et al., 2009). Duplicate reads were filtered and peaks were called  
639 with the MACS2 peak-calling algorithm using default parameters, except for H3K27me3 peaks which were  
640 called using 'broad peak' settings (Zhang et al., 2008). Following sequencing, differential binding analysis  
641 was completed with DiffBind software on standard settings (Ross-Innes et al., 2012). Differentially bound  
642 sites were annotated with ChIPseeker (Yu et al., 2015) and annotatr (Cavalcante and Sartor, 2017) packages.  
643 Enhancer regions were based on Fantom5 classifications. Bam alignment files were converted into bigwig files  
644 by binning reads into 100bp segments. Global enrichment plots and heatmap visuals for H3K4me3, H3K9ac,  
645 K3K27me3, and RNAPol2 at the top 100 most differentially enriched RNAPol2 peaks in primary and recurrent  
646 cohorts were generated using deepTools2 software (Ramirez et al., 2016). The number of overlapping ChIP-  
647 seq peaks with at least one base pair shared was determined with ChIPpeakAnno (Zhu et al., 2010). Publicly  
648 available H3K4me1 and H3K27ac ChIP-seq data for mouse embryonic fibroblasts were obtained from

649 ENCODE (via Bing Ren, Ludwig Institute for Cancer Research) and accessed via GEO numbers GSM769028  
650 and GSM1000139, respectively (Consortium, 2012).

651

## 652 **RNA sequencing**

653 RNA was extracted using the RNeasy kit (Qiagen) and concentrations quantified using Qubit 2.0 and  
654 Agilent Bioanalyzer. cDNA libraries were prepared with the Kapa stranded mRNA kit. Pooled sample libraries  
655 were sequenced on HiSeq 4000 (Illumina) sequencer to 50 bp single reads at ~25-30 million read depth per  
656 sample. Fastq files were assessed for quality control with FastQC software. Raw sequencing reads were then  
657 trimmed of low quality base pairs and adapters with Trim Galore! Processed sequencing reads were aligned to  
658 the mm10 genome with STAR ultrafast universal RNA-seq aligner (Dobin et al., 2013). The number of  
659 transcript counts per gene were counted on the reverse strand with featureCounts software and organized into  
660 a count matrix for passing through differential gene expression analysis with DESeq2 software (Love et al.,  
661 2014). Of note, recurrent tumor cell line #2 and primary tumor cell line #3 were completed as a separate batch,  
662 and were corrected by adding the batch number as an additional variable. PCA analysis was produced using  
663 limma and ggplot2 package, and heatmaps were generated with pheatmap package in R (v3.5.2) software.  
664 Gene ontology for differential gene expression between primary and recurrent tumor cell lines was determined  
665 with clusterProfiler software (Yu et al., 2012). For GSEA analysis, genes were pre-ranked based on topics of  
666 interest (i.e. genes differentially expressed in recurrent tumor cell lines or genes upregulated following BIX  
667 administration) and input into desktop GSEA software (Broad Institute).

668 To determine whether the magnitude of gene expression is significantly altered between primary and  
669 recurrent tumor cells, the DESeq2 model was designed using Batch + Cell\_Line + Condition +  
670 Cell\_Line:Condition. Significant differences in the magnitude of induction was determined by an adjusted  $P$   
671 value of  $<0.05$ . Recurrent tumor cell line #4 was excluded from these analyses, as we were interested in gene  
672 expression alterations specific to recurrent tumor cell lines that were sensitive to G9a inhibition. Significantly  
673 altered genes from the analysis were labeled in color on the scatterplot of gene expression changes specific to  
674 recurrent cells (y-axis) and primary cells (x-axis) in R software using ggplot2 software.

675 For heatmap generation of significantly altered genes with BIX treatment,  $\log_2$  gene expression was  
676 median-centered within each cohort (i.e. recurrent and primary) to eliminate baseline gene expression  
677 differences between primary and recurrent cohorts. Each row was Z-score normalized and input into  
678 ‘pheatmap’ software. Genes were clustered according to ‘complete’ method.

679

## 680 **Integrated RNA- and ChIP-sequencing**

681 Genes that were significantly upregulated with BIX in recurrent tumor cell lines #1, #2, and #3 by RNA  
682 sequencing (P. adj.  $<0.05$  vs. primary tumor cell lines #1, #2, and #3) were overlapped with gene promoters  
683 significantly depleted (P adj.  $<0.05$ ) of H3K9ac in recurrent tumor cell lines #1, #2, and #3 relative to primary  
684 tumor cell lines #1 and #2 by ChIP-sequencing. Dot plot of overlapped data was generated in GraphPad Prism  
685 8 software. Gene ontology of these genes was determined by clusterProfiler package (Yu et al., 2012). This  
686 G9a-regulated gene set was input into online software (available at: <http://co.bmc.lu.se/gobo/gsa.pl>) to  
687 determine human distant metastasis-free survival based on a gene set. Settings for this analysis were set for  
688 distant metastasis-free survival (DMFS) for all tumors censored at 10 days and divided into 3 quantiles  
689 (Ringner et al., 2011). Shown are plots for Luminal B and Her2-enriched tumors. A high G9a signature was  
690 determined by low global expression of G9a-regulated genes.

691

## 692 **Statistical Analysis**

693 Western blots show representative results from at least two independent experiments. Gene expression  
694 analysis show results from a single representative experiment and are shown as the mean  $\pm$  the SEM. Two-  
695 tailed Student’s t-test was used for statistical analyses between two groups. One- or two-way ANOVA with  
696 Sidak’s multiple comparisons test was used to compare statistics across multiple groups. Fisher’s exact test  
697 was used to evaluate significance between categorical (i.e. Met amplification) data. Differences in survival  
698 were determined by Mantel-Cox log-rank test. A *P* value of  $<0.05$  was considered significant.

699

## 700 **Supplemental Information**

701 Figure S1 includes additional analysis of cell lines features and ChIP-seq analysis. Figure S2 validates  
702 on-target effects of G9a inhibition, and shows additional controls from in vivo experiments. Figure S3  
703 provides ChIP-qPCR and gene expression data to support the G9a-regulated gene set reported in the main  
704 figures, and presents immune profiling of BIX-treated tumors. Figure S4 includes additional data to support a  
705 role of p53 in BIX-mediated cell death. Figure S5 shows the effect of G9a inhibition on a wide panel of human  
706 cell lines. Table S1 shows epigenetic drug targets from the screen. Table S2 shows differentially regulated  
707 genes following BIX treatment. Table S3 is the integrated G9a-regulated gene set. Table S4 is the curated  
708 necroptosis gene set used for GSEA. Table S5 provides a list of antibodies, primer sequences, probes, and  
709 additional reagents.



## **Acknowledgements**

We thank So Young Kim and the Duke Functional Genomics Core for the generation and validation of single guide RNAs targeting G9a and p53; David Corcoran for assistance in the interpretation of ChIP-sequencing data; and Nicolas Devos from the Duke Sequencing and Genomics Technologies Core for acquisition of RNA- and ChIP-sequencing reads. We thank members of the Alvarez lab, including Andrea Walens for assistance with mammary gland injections, Ashley DiMarco for technical assistance with flow cytometry, and Doug Fox for the generation of Cas9-expressing tumor cells. This work was funded by the National Cancer Institute under award numbers R01CA208042 (to JVA), F31CA220851 (to NWM), and F31CA239421 (to RN), as well as the American Cancer Society under award 132556-RSG-18-130-CCG (to JVA) and by startup funds from the Duke Cancer Institute, the Duke University School of Medicine, and the Whitehead Foundation (to JVA).

## **Author contributions**

NWM, SEW, RN, RCM, BAV generated and analyzed data. RN and RL assisted with animal work. SEW, RCM, and BAV assisted with generation of human cell line treatments. SEW assisted with drug screening and biochemical analysis of p53 knockout. RN performed immune profiling. NWM and JVA wrote and edited the manuscript. JVA supervised all work. All authors reviewed the manuscript.

## References

- Alvarez, J.V., T.C. Pan, J. Ruth, Y. Feng, A. Zhou, D. Pant, J.S. Grimley, T.J. Wandless, A. Demichele, I.S.T. Investigators, and L.A. Chodosh. 2013. Par-4 downregulation promotes breast cancer recurrence by preventing multinucleation following targeted therapy. *Cancer Cell* 24:30-44.
- Annibaldi, A., and P. Meier. 2018. Checkpoints in TNF-Induced Cell Death: Implications in Inflammation and Cancer. *Trends Mol Med* 24:49-65.
- Avgustinova, A., A. Symeonidi, A. Castellanos, U. Urdirroz-Urricelqui, L. Sole-Boldo, M. Martin, I. Perez-Rodriguez, N. Prats, B. Lehner, F. Supek, and S.A. Benitah. 2018. Loss of G9a preserves mutation patterns but increases chromatin accessibility, genomic instability and aggressiveness in skin tumours. *Nat Cell Biol* 20:1400-1409.
- Bradner, J.E., D. Hnisz, and R.A. Young. 2017. Transcriptional Addiction in Cancer. *Cell* 168:629-643.
- Brien, G.L., D.G. Valerio, and S.A. Armstrong. 2016. Exploiting the Epigenome to Control Cancer-Promoting Gene-Expression Programs. *Cancer Cell* 29:464-476.
- Burow, M.E., C.B. Weldon, Y. Tang, G.L. Navar, S. Krajewski, J.C. Reed, T.G. Hammond, S. Clejan, and B.S. Beckman. 1998. Differences in susceptibility to tumor necrosis factor alpha-induced apoptosis among MCF-7 breast cancer cell variants. *Cancer Res* 58:4940-4946.
- Callow, M.G., C. Watanabe, K.E. Wickliffe, R. Bainer, S. Kummerfield, J. Weng, T. Cuellar, V. Janakiraman, H. Chen, B. Chih, Y. Liang, B. Haley, K. Newton, and M.R. Costa. 2018. CRISPR whole-genome screening identifies new necroptosis regulators and RIPK1 alternative splicing. *Cell Death Dis* 9:261.
- Casciello, F., F. Al-Ejeh, G. Kelly, D.J. Brennan, S.F. Ngiow, A. Young, T. Stoll, K. Windloch, M.M. Hill, M.J. Smyth, F. Gannon, and J.S. Lee. 2017. G9a drives hypoxia-mediated gene repression for breast cancer cell survival and tumorigenesis. *Proc Natl Acad Sci U S A* 114:7077-7082.
- Cavalcante, R.G., and M.A. Sartor. 2017. annotatr: genomic regions in context. *Bioinformatics* 33:2381-2383.
- Chaffer, C.L., N.D. Marjanovic, T. Lee, G. Bell, C.G. Kleer, F. Reinhardt, A.C. D'Alessio, R.A. Young, and R.A. Weinberg. 2013. Poised chromatin at the ZEB1 promoter enables breast cancer cell plasticity and enhances tumorigenicity. *Cell* 154:61-74.
- Chang, Y., X. Zhang, J.R. Horton, A.K. Upadhyay, A. Spannhoff, J. Liu, J.P. Snyder, M.T. Bedford, and X. Cheng. 2009. Structural basis for G9a-like protein lysine methyltransferase inhibition by BIX-01294. *Nat Struct Mol Biol* 16:312-317.
- Chapman-Rothe, N., E. Curry, C. Zeller, D. Liber, E. Stronach, H. Gabra, S. Ghaem-Maghani, and R. Brown. 2013. Chromatin H3K27me3/H3K4me3 histone marks define gene sets in high-grade serous ovarian cancer that distinguish malignant, tumour-sustaining and chemo-resistant ovarian tumour cells. *Oncogene* 32:4586-4592.
- Chen, D., J. Tong, L. Yang, L. Wei, D.B. Stolz, J. Yu, J. Zhang, and L. Zhang. 2018a. PUMA amplifies necroptosis signaling by activating cytosolic DNA sensors. *Proc Natl Acad Sci U S A* 115:3930-3935.
- Chen, L., G. Alexe, N.V. Dharia, L. Ross, A.B. Iniguez, A.S. Conway, E.J. Wang, V. Veschi, N. Lam, J. Qi, W.C. Gustafson, N. Nasholm, F. Vazquez, B.A. Weir, G.S. Cowley, L.D. Ali, S. Pantel, G. Jiang, W.F. Harrington, Y. Lee, A. Goodale, R. Lubonja, J.M. Krill-Burger, R.M. Meyers, A. Tsherniak, D.E. Root, J.E. Bradner, T.R. Golub, C.W. Roberts, W.C. Hahn, W.A. Weiss, C.J. Thiele, and K. Stegmaier. 2018b. CRISPR-Cas9 screen reveals a MYCN-amplified neuroblastoma dependency on EZH2. *J Clin Invest* 128:446-462.
- Consortium, E.P. 2012. An integrated encyclopedia of DNA elements in the human genome. *Nature* 489:57-74.
- De Santa, F., I. Barozzi, F. Mietton, S. Ghisletti, S. Polletti, B.K. Tusi, H. Muller, J. Ragoussis, C.L. Wei, and G. Natoli. 2010. A large fraction of extragenic RNA pol II transcription sites overlap enhancers. *PLoS Biol* 8:e1000384.
- Dobin, A., C.A. Davis, F. Schlesinger, J. Drenkow, C. Zaleski, S. Jha, P. Batut, M. Chaisson, and T.R. Gingeras. 2013. STAR: ultrafast universal RNA-seq aligner. *Bioinformatics* 29:15-21.
- Elsheikh, S.E., A.R. Green, E.A. Rakha, D.G. Powe, R.A. Ahmed, H.M. Collins, D. Soria, J.M. Garibaldi, C.E. Paish, A.A. Ammar, M.J. Grainge, G.R. Ball, M.K. Abdelghany, L. Martinez-Pomares, D.M. Heery, and

- I.O. Ellis. 2009. Global histone modifications in breast cancer correlate with tumor phenotypes, prognostic factors, and patient outcome. *Cancer Res* 69:3802-3809.
- Fan, J.D., P.J. Lei, J.Y. Zheng, X. Wang, S. Li, H. Liu, Y.L. He, Z.N. Wang, G. Wei, X. Zhang, L.Y. Li, and M. Wu. 2015. The selective activation of p53 target genes regulated by SMYD2 in BIX-01294 induced autophagy-related cell death. *Plos One* 10:e0116782.
- Feng, Y., T.C. Pan, D.K. Pant, K.R. Chakrabarti, J.V. Alvarez, J.R. Ruth, and L.A. Chodosh. 2014. SPSB1 promotes breast cancer recurrence by potentiating c-MET signaling. *Cancer Discov* 4:790-803.
- Gardner, E.E., B.H. Lok, V.E. Schneeberger, P. Desmeules, L.A. Miles, P.K. Arnold, A. Ni, I. Khodos, E. de Stanchina, T. Nguyen, J. Sage, J.E. Campbell, S. Ribich, N. Rekhtman, A. Dowlati, P.P. Massion, C.M. Rudin, and J.T. Poirier. 2017. Chemosensitive Relapse in Small Cell Lung Cancer Proceeds through an EZH2-SLFN11 Axis. *Cancer Cell* 31:286-299.
- Goel, S., Q. Wang, A.C. Watt, S.M. Tolaney, D.A. Dillon, W. Li, S. Ramm, A.C. Palmer, H. Yuzugullu, V. Varadan, D. Tuck, L.N. Harris, K.K. Wong, X.S. Liu, P. Sicinski, E.P. Winer, I.E. Krop, and J.J. Zhao. 2016. Overcoming Therapeutic Resistance in HER2-Positive Breast Cancers with CDK4/6 Inhibitors. *Cancer Cell* 29:255-269.
- Hanggi, K., L. Vasilikos, A.F. Valls, R. Yerbes, J. Knop, L.M. Spilgies, K. Rieck, T. Misra, J. Bertin, P.J. Gough, T. Schmidt, C.R. de Almodovar, and W.W. Wong. 2017. RIPK1/RIPK3 promotes vascular permeability to allow tumor cell extravasation independent of its necroptotic function. *Cell Death Dis* 8:e2588.
- Haque, R., S.A. Ahmed, G. Inzhakova, J. Shi, C. Avila, J. Polikoff, L. Bernstein, S.M. Enger, and M.F. Press. 2012. Impact of breast cancer subtypes and treatment on survival: an analysis spanning two decades. *Cancer Epidemiol Biomarkers Prev* 21:1848-1855.
- Hitomi, J., D.E. Christofferson, A. Ng, J. Yao, A. Degterev, R.J. Xavier, and J. Yuan. 2008. Identification of a molecular signaling network that regulates a cellular necrotic cell death pathway. *Cell* 135:1311-1323.
- Howlander, N., S.F. Altekruze, C.I. Li, V.W. Chen, C.A. Clarke, L.A. Ries, and K.A. Cronin. 2014. US incidence of breast cancer subtypes defined by joint hormone receptor and HER2 status. *J Natl Cancer Inst* 106:
- Huang, J., J. Dorsey, S. Chuikov, L. Perez-Burgos, X. Zhang, T. Jenuwein, D. Reinberg, and S.L. Berger. 2010. G9a and Glp methylate lysine 373 in the tumor suppressor p53. *J Biol Chem* 285:9636-9641.
- Hurley, J., P. Doliny, I. Reis, O. Silva, C. Gomez-Fernandez, P. Velez, G. Pauletti, J.E. Powell, M.D. Pegram, and D.J. Slamon. 2006. Docetaxel, cisplatin, and trastuzumab as primary systemic therapy for human epidermal growth factor receptor 2-positive locally advanced breast cancer. *J Clin Oncol* 24:1831-1838.
- Jenuwein, T. 2006. The epigenetic magic of histone lysine methylation. *FEBS J* 273:3121-3135.
- Jenuwein, T., G. Laible, R. Dorn, and G. Reuter. 1998. SET domain proteins modulate chromatin domains in eu- and heterochromatin. *Cell Mol Life Sci* 54:80-93.
- Karmodiya, K., A.R. Krebs, M. Oulad-Abdelghani, H. Kimura, and L. Tora. 2012. H3K9 and H3K14 acetylation co-occur at many gene regulatory elements, while H3K14ac marks a subset of inactive inducible promoters in mouse embryonic stem cells. *BMC Genomics* 13:424.
- Kim, C., R. Gao, E. Sei, R. Brandt, J. Hartman, T. Hatschek, N. Crosetto, T. Foukakis, and N.E. Navin. 2018. Chemoresistance Evolution in Triple-Negative Breast Cancer Delineated by Single-Cell Sequencing. *Cell* 173:879-893 e813.
- Kim, Y., Y.S. Kim, D.E. Kim, J.S. Lee, J.H. Song, H.G. Kim, D.H. Cho, S.Y. Jeong, D.H. Jin, S.J. Jang, H.S. Seol, Y.A. Suh, S.J. Lee, C.S. Kim, J.Y. Koh, and J.J. Hwang. 2013. BIX-01294 induces autophagy-associated cell death via EHMT2/G9a dysfunction and intracellular reactive oxygen species production. *Autophagy* 9:2126-2139.
- Knoechel, B., J.E. Roderick, K.E. Williamson, J. Zhu, J.G. Lohr, M.J. Cotton, S.M. Gillespie, D. Fernandez, M. Ku, H. Wang, F. Piccioni, S.J. Silver, M. Jain, D. Pearson, M.J. Kluk, C.J. Ott, L.D. Shultz, M.A. Brehm, D.L. Greiner, A. Gutierrez, K. Stegmaier, A.L. Kung, D.E. Root, J.E. Bradner, J.C. Aster, M.A. Kelliher, and B.E. Bernstein. 2014. An epigenetic mechanism of resistance to targeted therapy in T cell acute lymphoblastic leukemia. *Nat Genet* 46:364-370.

- Koo, G.B., M.J. Morgan, D.G. Lee, W.J. Kim, J.H. Yoon, J.S. Koo, S.I. Kim, S.J. Kim, M.K. Son, S.S. Hong, J.M. Levy, D.A. Pollyea, C.T. Jordan, P. Yan, D. Frankhouser, D. Nicolet, K. Maharry, G. Marcucci, K.S. Choi, H. Cho, A. Thorburn, and Y.S. Kim. 2015. Methylation-dependent loss of RIP3 expression in cancer represses programmed necrosis in response to chemotherapeutics. *Cell Res* 25:707-725.
- Kubicek, S., R.J. O'Sullivan, E.M. August, E.R. Hickey, Q. Zhang, M.L. Teodoro, S. Rea, K. Mechtler, J.A. Kowalski, C.A. Homon, T.A. Kelly, and T. Jenuwein. 2007. Reversal of H3K9me2 by a small-molecule inhibitor for the G9a histone methyltransferase. *Mol Cell* 25:473-481.
- Langmead, B., C. Trapnell, M. Pop, and S.L. Salzberg. 2009. Ultrafast and memory-efficient alignment of short DNA sequences to the human genome. *Genome Biol* 10:R25.
- Laster, S.M., J.G. Wood, and L.R. Gooding. 1988. Tumor necrosis factor can induce both apoptic and necrotic forms of cell lysis. *J Immunol* 141:2629-2634.
- Lee, J.S., Y. Kim, J. Bhin, H.J. Shin, H.J. Nam, S.H. Lee, J.B. Yoon, O. Binda, O. Gozani, D. Hwang, and S.H. Baek. 2011. Hypoxia-induced methylation of a pontin chromatin remodeling factor. *Proc Natl Acad Sci USA* 108:13510-13515.
- Lee, J.S., Y. Kim, I.S. Kim, B. Kim, H.J. Choi, J.M. Lee, H.J. Shin, J.H. Kim, J.Y. Kim, S.B. Seo, H. Lee, O. Binda, O. Gozani, G.L. Semenza, M. Kim, K.I. Kim, D. Hwang, and S.H. Baek. 2010. Negative regulation of hypoxic responses via induced Reptin methylation. *Mol Cell* 39:71-85.
- Li, H., Q. Yao, A.G. Mariscal, X. Wu, J. Hulse, E. Pedersen, K. Helin, A. Waisman, C. Vinkel, S.F. Thomsen, A. Avgustinova, S.A. Benitah, P. Lovato, H. Norsgaard, M.S. Mortensen, L. Veng, B. Rozell, and C. Brakebusch. 2018. Epigenetic control of IL-23 expression in keratinocytes is important for chronic skin inflammation. *Nat Commun* 9:1420.
- Liu, P., H. Cheng, S. Santiago, M. Raeder, F. Zhang, A. Isabella, J. Yang, D.J. Semaan, C. Chen, E.A. Fox, N.S. Gray, J. Monahan, R. Schlegel, R. Beroukhim, G.B. Mills, and J.J. Zhao. 2011. Oncogenic PIK3CA-driven mammary tumors frequently recur via PI3K pathway-dependent and PI3K pathway-independent mechanisms. *Nat Med* 17:1116-1120.
- Liu, X., M. Zhou, L. Mei, J. Ruan, Q. Hu, J. Peng, H. Su, H. Liao, S. Liu, W. Liu, H. Wang, Q. Huang, F. Li, and C.Y. Li. 2016. Key roles of necroptotic factors in promoting tumor growth. *Oncotarget* 7:22219-22233.
- Loibl, S., I. Majewski, V. Guarneri, V. Nekljudova, E. Holmes, E. Bria, C. Denkert, C. Schem, C. Sotiriou, S. Loi, M. Untch, P. Conte, R. Bernards, M. Piccart, G. von Minckwitz, and J. Baselga. 2018. PIK3CA mutations are associated with reduced pathological complete response rates in primary HER2-positive breast cancer: pooled analysis of 967 patients from five prospective trials investigating lapatinib and trastuzumab. *Ann Oncol* 29:2151.
- Love, M.I., W. Huber, and S. Anders. 2014. Moderated estimation of fold change and dispersion for RNA-seq data with DESeq2. *Genome Biol* 15:550.
- Mabe, N.W., D.B. Fox, R. Lupo, A.E. Decker, S.N. Phelps, J.W. Thompson, and J.V. Alvarez. 2018. Epigenetic silencing of tumor suppressor Par-4 promotes chemoresistance in recurrent breast cancer. *J Clin Invest*
- Mittendorf, E.A., Y. Wu, M. Scaltriti, F. Meric-Bernstam, K.K. Hunt, S. Dawood, F.J. Esteva, A.U. Buzdar, H. Chen, S. Eksambi, G.N. Hortobagyi, J. Baselga, and A.M. Gonzalez-Angulo. 2009. Loss of HER2 amplification following trastuzumab-based neoadjuvant systemic therapy and survival outcomes. *Clin Cancer Res* 15:7381-7388.
- Moody, S.E., D. Perez, T.C. Pan, C.J. Sarkisian, C.P. Portocarrero, C.J. Sterner, K.L. Notorfrancesco, R.D. Cardiff, and L.A. Chodosh. 2005. The transcriptional repressor Snail promotes mammary tumor recurrence. *Cancer Cell* 8:197-209.
- Moody, S.E., C.J. Sarkisian, K.T. Hahn, E.J. Gunther, S. Pickup, K.D. Dugan, N. Innocent, R.D. Cardiff, M.D. Schnall, and L.A. Chodosh. 2002. Conditional activation of Neu in the mammary epithelium of transgenic mice results in reversible pulmonary metastasis. *Cancer Cell* 2:451-461.
- Nagata, Y., K.H. Lan, X. Zhou, M. Tan, F.J. Esteva, A.A. Sahin, K.S. Klos, P. Li, B.P. Monia, N.T. Nguyen, G.N. Hortobagyi, M.C. Hung, and D. Yu. 2004. PTEN activation contributes to tumor inhibition by trastuzumab, and loss of PTEN predicts trastuzumab resistance in patients. *Cancer Cell* 6:117-127.

- Newton, K. 2015. RIPK1 and RIPK3: critical regulators of inflammation and cell death. *Trends Cell Biol* 25:347-353.
- Nikoletopoulou, V., M. Markaki, K. Palikaras, and N. Tavernarakis. 2013. Crosstalk between apoptosis, necrosis and autophagy. *Biochim Biophys Acta* 1833:3448-3459.
- O'Donnell, M.A., E. Perez-Jimenez, A. Oberst, A. Ng, R. Massoumi, R. Xavier, D.R. Green, and A.T. Ting. 2011. Caspase 8 inhibits programmed necrosis by processing CYLD. *Nat Cell Biol* 13:1437-1442.
- Pastor, D.M., R.B. Irby, and L.S. Poritz. 2010. Tumor necrosis factor alpha induces p53 up-regulated modulator of apoptosis expression in colorectal cancer cell lines. *Dis Colon Rectum* 53:257-263.
- Pekowska, A., T. Benoukraf, J. Zacarias-Cabeza, M. Belhocine, F. Koch, H. Holota, J. Imbert, J.C. Andrau, P. Ferrier, and S. Spicuglia. 2011. H3K4 tri-methylation provides an epigenetic signature of active enhancers. *EMBO J* 30:4198-4210.
- Puzio-Kuter, A.M. 2011. The Role of p53 in Metabolic Regulation. *Genes Cancer* 2:385-391.
- Ramirez, F., D.P. Ryan, B. Gruning, V. Bhardwaj, F. Kilpert, A.S. Richter, S. Heyne, F. Dundar, and T. Manke. 2016. deepTools2: a next generation web server for deep-sequencing data analysis. *Nucleic Acids Res* 44:W160-W165.
- Rice, J.C., S.D. Briggs, B. Ueberheide, C.M. Barber, J. Shabanowitz, D.F. Hunt, Y. Shinkai, and C.D. Allis. 2003. Histone methyltransferases direct different degrees of methylation to define distinct chromatin domains. *Mol Cell* 12:1591-1598.
- Ringner, M., E. Fredlund, J. Hakkinen, A. Borg, and J. Staaf. 2011. GOBO: Gene Expression-Based Outcome for Breast Cancer Online. *Plos One* 6:
- Rodriguez, D.A., R. Weinlich, S. Brown, C. Guy, P. Fitzgerald, C.P. Dillon, A. Oberst, G. Quarato, J. Low, J.G. Cripps, T. Chen, and D.R. Green. 2016. Characterization of RIPK3-mediated phosphorylation of the activation loop of MLKL during necroptosis. *Cell Death Differ* 23:76-88.
- Rokhlin, O.W., A.V. Gudkov, S. Kwek, R.A. Glover, A.S. Gewies, and M.B. Cohen. 2000. p53 is involved in tumor necrosis factor-alpha-induced apoptosis in the human prostatic carcinoma cell line LNCaP. *Oncogene* 19:1959-1968.
- Ross-Innes, C.S., R. Stark, A.E. Teschendorff, K.A. Holmes, H.R. Ali, M.J. Dunning, G.D. Brown, O. Gojis, I.O. Ellis, A.R. Green, S. Ali, S.F. Chin, C. Palmieri, C. Caldas, and J.S. Carroll. 2012. Differential oestrogen receptor binding is associated with clinical outcome in breast cancer. *Nature* 481:389-U177.
- Rowbotham, S.P., F. Li, A.F.M. Dost, S.M. Louie, B.P. Marsh, P. Pessina, C.R. Anbarasu, C.F. Brainson, S.J. Tuminello, A. Lieberman, S. Ryeom, T.M. Schlaeger, B.J. Aronow, H. Watanabe, K.K. Wong, and C.F. Kim. 2018. H3K9 methyltransferases and demethylases control lung tumor-propagating cells and lung cancer progression. *Nat Commun* 9:4559.
- Schultz, D.C., K. Ayyanathan, D. Negorev, G.G. Maul, and F.J. Rauscher, 3rd. 2002. SETDB1: a novel KAP-1-associated histone H3, lysine 9-specific methyltransferase that contributes to HP1-mediated silencing of euchromatic genes by KRAB zinc-finger proteins. *Genes Dev* 16:919-932.
- Seifert, L., G. Werba, S. Tiwari, N.N. Giao Ly, S. Alothman, D. Alqunaibit, A. Avanzi, R. Barilla, D. Daley, S.H. Greco, A. Torres-Hernandez, M. Pergamo, A. Ochi, C.P. Zambirinis, M. Pansari, M. Rendon, D. Tippens, M. Hundeyin, V.R. Mani, C. Hajdu, D. Engle, and G. Miller. 2016. The necrosome promotes pancreatic oncogenesis via CXCL1 and Mincle-induced immune suppression. *Nature* 532:245-249.
- Selli, C., A.K. Turnbull, D.A. Pearce, A. Li, A. Fernando, J. Wills, L. Renshaw, J.S. Thomas, J.M. Dixon, and A.H. Sims. 2019. Molecular changes during extended neoadjuvant letrozole treatment of breast cancer: distinguishing acquired resistance from dormant tumours. *Breast Cancer Res* 21:2.
- Serresi, M., B. Siteur, D. Hulsman, C. Company, M.J. Schmitt, C. Lieftink, B. Morris, M. Cesaroni, N. Proost, R.L. Beijersbergen, M. van Lohuizen, and G. Gargiulo. 2018. Ezh2 inhibition in Kras-driven lung cancer amplifies inflammation and associated vulnerabilities. *J Exp Med* 215:3115-3135.
- Shaffer, S.M., M.C. Dunagin, S.R. Torborg, E.A. Torre, B. Emert, C. Krepler, M. Beqiri, K. Sproesser, P.A. Brafford, M. Xiao, E. Eggen, I.N. Anastopoulos, C.A. Vargas-Garcia, A. Singh, K.L. Nathanson, M. Herlyn, and A. Raj. 2017. Rare cell variability and drug-induced reprogramming as a mode of cancer drug resistance. *Nature* 546:431-435.

- Sharma, S.V., D.Y. Lee, B. Li, M.P. Quinlan, F. Takahashi, S. Maheswaran, U. McDermott, N. Azizian, L. Zou, M.A. Fischbach, K.K. Wong, K. Brandstetter, B. Wittner, S. Ramaswamy, M. Classon, and J. Settleman. 2010. A chromatin-mediated reversible drug-tolerant state in cancer cell subpopulations. *Cell* 141:69-80.
- Shattuck, D.L., J.K. Miller, K.L. Carraway, 3rd, and C. Sweeney. 2008. Met receptor contributes to trastuzumab resistance of Her2-overexpressing breast cancer cells. *Cancer Res* 68:1471-1477.
- Sparano, J.A., F. Zhao, S. Martino, J.A. Ligibel, E.A. Perez, T. Saphner, A.C. Wolff, G.W. Sledge, Jr., W.C. Wood, and N.E. Davidson. 2015. Long-Term Follow-Up of the E1199 Phase III Trial Evaluating the Role of Taxane and Schedule in Operable Breast Cancer. *J Clin Oncol* 33:2353-2360.
- Suzuki, J., Y.Y. Chen, G.K. Scott, S. Devries, K. Chin, C.C. Benz, F.M. Waldman, and E.S. Hwang. 2009. Protein acetylation and histone deacetylase expression associated with malignant breast cancer progression. *Clin Cancer Res* 15:3163-3171.
- Tachibana, M., J. Ueda, M. Fukuda, N. Takeda, T. Ohta, H. Iwanari, T. Sakihama, T. Kodama, T. Hamakubo, and Y. Shinkai. 2005. Histone methyltransferases G9a and GLP form heteromeric complexes and are both crucial for methylation of euchromatin at H3-K9. *Genes Dev* 19:815-826.
- Tanikawa, C., M. Espinosa, A. Suzuki, K. Masuda, K. Yamamoto, E. Tsuchiya, K. Ueda, Y. Daigo, Y. Nakamura, and K. Matsuda. 2012. Regulation of histone modification and chromatin structure by the p53-PADI4 pathway. *Nat Commun* 3:676.
- Tu, H.C., D. Ren, G.X. Wang, D.Y. Chen, T.D. Westergard, H. Kim, S. Sasagawa, J.J. Hsieh, and E.H. Cheng. 2009. The p53-cathepsin axis cooperates with ROS to activate programmed necrotic death upon DNA damage. *Proc Natl Acad Sci U S A* 106:1093-1098.
- Tu, W.B., Y.J. Shiah, C. Lourenco, P.J. Mullen, D. Dingar, C. Redel, A. Tamachi, W. Ba-Alawi, A. Aman, R. Al-Awar, D.W. Cescon, B. Haibe-Kains, C.H. Arrowsmith, B. Raught, P.C. Boutros, and L.Z. Penn. 2018. MYC Interacts with the G9a Histone Methyltransferase to Drive Transcriptional Repression and Tumorigenesis. *Cancer Cell* 34:579-595 e578.
- Vedadi, M., D. Barsyte-Lovejoy, F. Liu, S. Rival-Gervier, A. Allali-Hassani, V. Labrie, T.J. Wigle, P.A. Dimaggio, G.A. Wasney, A. Siarheyeva, A. Dong, W. Tempel, S.C. Wang, X. Chen, I. Chau, T.J. Mangano, X.P. Huang, C.D. Simpson, S.G. Pattenden, J.L. Norris, D.B. Kireev, A. Tripathy, A. Edwards, B.L. Roth, W.P. Janzen, B.A. Garcia, A. Petronis, J. Ellis, P.J. Brown, S.V. Frye, C.H. Arrowsmith, and J. Jin. 2011. A chemical probe selectively inhibits G9a and GLP methyltransferase activity in cells. *Nat Chem Biol* 7:566-574.
- Vucur, M., F. Reisinger, J. Gautheron, J. Janssen, C. Roderburg, D.V. Cardenas, K. Kreggenwinkel, C. Koppe, L. Hammerich, R. Hakem, K. Unger, A. Weber, N. Gassler, M. Luedde, N. Frey, U.P. Neumann, F. Tacke, C. Trautwein, M. Heikenwalder, and T. Luedde. 2013. RIP3 inhibits inflammatory hepatocarcinogenesis but promotes cholestasis by controlling caspase-8- and JNK-dependent compensatory cell proliferation. *Cell Rep* 4:776-790.
- Wang, H., W. An, R. Cao, L. Xia, H. Erdjument-Bromage, B. Chatton, P. Tempst, R.G. Roeder, and Y. Zhang. 2003. mAM facilitates conversion by ESET of dimethyl to trimethyl lysine 9 of histone H3 to cause transcriptional repression. *Mol Cell* 12:475-487.
- Wang, K., F. Liu, C.Y. Liu, T. An, J. Zhang, L.Y. Zhou, M. Wang, Y.H. Dong, N. Li, J.N. Gao, Y.F. Zhao, and P.F. Li. 2016. The long noncoding RNA NRF regulates programmed necrosis and myocardial injury during ischemia and reperfusion by targeting miR-873. *Cell Death Differ* 23:1394-1405.
- Wang, X., and Y. Lin. 2008. Tumor necrosis factor and cancer, buddies or foes? *Acta Pharmacol Sin* 29:1275-1288.
- Wang, Z., C. Zang, K. Cui, D.E. Schones, A. Barski, W. Peng, and K. Zhao. 2009. Genome-wide mapping of HATs and HDACs reveals distinct functions in active and inactive genes. *Cell* 138:1019-1031.
- Weinlich, R., A. Oberst, H.M. Beere, and D.R. Green. 2017. Necroptosis in development, inflammation and disease. *Nat Rev Mol Cell Biol* 18:127-136.
- Yates, L.R., S. Knappskog, D. Wedge, J.H.R. Farmery, S. Gonzalez, I. Martincorena, L.B. Alexandrov, P. Van Loo, H.K. Haugland, P.K. Lilleng, G. Gundem, M. Gerstung, E. Pappaemmanuil, P. Gazinska, S.G. Boshle, D. Jones, K. Raine, L. Mudie, C. Latimer, E. Sawyer, C. Desmedt, C. Sotiriou, M.R. Stratton,

- A.M. Sieuwerts, A.G. Lynch, J.W. Martens, A.L. Richardson, A. Tutt, P.E. Lonning, and P.J. Campbell. 2017. Genomic Evolution of Breast Cancer Metastasis and Relapse. *Cancer Cell* 32:169-184 e167.
- Yu, G., L.G. Wang, Y. Han, and Q.Y. He. 2012. clusterProfiler: an R package for comparing biological themes among gene clusters. *OMICS* 16:284-287.
- Yu, G.C., L.G. Wang, and Q.Y. He. 2015. ChIPseeker: an R/Bioconductor package for ChIP peak annotation, comparison and visualization. *Bioinformatics* 31:2382-2383.
- Zhang, Y., T. Liu, C.A. Meyer, J. Eeckhoutte, D.S. Johnson, B.E. Bernstein, C. Nusbaum, R.M. Myers, M. Brown, W. Li, and X.S. Liu. 2008. Model-based analysis of ChIP-Seq (MACS). *Genome Biol* 9:R137.
- Zhu, K., W. Liang, Z. Ma, D. Xu, S. Cao, X. Lu, N. Liu, B. Shan, L. Qian, and J. Yuan. 2018. Necroptosis promotes cell-autonomous activation of proinflammatory cytokine gene expression. *Cell Death Dis* 9:500.
- Zhu, L.J., C. Gazin, N.D. Lawson, H. Pages, S.M. Lin, D.S. Lapointe, and M.R. Green. 2010. ChIPpeakAnno: a Bioconductor package to annotate ChIP-seq and ChIP-chip data. *BMC Bioinformatics* 11:237.



## Figure Captions

### **Figure 1: Tumor recurrence is associated with widespread epigenetic remodeling.**

- A) Venn diagrams showing the number of ChIP-seq peaks unique to primary (n=2 cell lines) or recurrent (n=3 cell lines) tumors, and the total number of peaks analyzed for each epigenetic mark.
- B) Heatmap showing enrichment for active (H3K4me3 and H3K9ac) and repressive (H3K27me3) histone marks at the top 100 differentially RNAPol2-bound genes in primary (left) and recurrent (right) tumor cell lines. Each row represents a different gene promoter.
- C) Heatmap showing unsupervised hierarchical clustering of 15,609 genes analyzed by RNA-sequencing for three primary and four recurrent tumor cell lines. Samples were performed in biological duplicate. Genes were median-centered and Z-score normalized within rows.
- D) Principal Components Analysis (PCA) of RNA sequencing from (C).
- E) Venn diagram showing the number of differentially expressed genes (adj. P-value < 0.05) between primary and recurrent tumor cell lines.
- F) Gene set enrichment analysis showing significantly enriched pathways in recurrent tumor cells.

### **Figure 2: Recurrent tumors are dependent upon G9a histone methyltransferase activity.**

- A) Tumor cells derived from primary or recurrent MTB;TAN tumors were treated with a panel of small-molecule inhibitors targeting epigenetic enzymes.
- B) Forest plot showing the difference in potency (i.e. IC50) between recurrent and primary tumor cells for each epigenetic inhibitor. Differences in IC50 values are shown with 95% confidence intervals.
- C) Heatmap showing the efficacy of each tested drug at the lowest concentration producing maximal cell growth inhibition. Significance between drug efficacy was determined by two-way ANOVA (Drug x Cohort) and Sidak's multiple comparison test.
- D) Crystal violet staining of primary or recurrent tumor cells treated with vehicle or 2  $\mu$ M BIX-01294 for 48 hours.

- E-G) Concentration response curves for primary (black) and recurrent (red) tumor cells treated with increasing concentrations of BIX-01294 (E), UNC-0638 (F), or BRD-4770 (G). IC<sub>50</sub> and standard error values were calculated for each cohort by non-linear regression and significance was evaluated by Student's unpaired t-test.
- H) Western blot analysis for G9a expression following infection with one of two independent sgRNAs targeting G9a (sgG9a#1 or sgG9a#2), or a non-targeting sgRNA (sgNT) in Cas9-expressing primary and recurrent tumor cell lines.
- I) Growth curves for control and G9a-knockdown primary and recurrent tumor cells. Asterisks denote significance between control and the nearest G9a sgRNA. Significance was determined by two-way ANOVA (time x sgRNA) followed by Sidak's multiple comparison test.

Error bars denote mean  $\pm$  SEM. \*p-value <0.05, \*\* p-value <0.01, \*\*\* p-value <0.001.

**Figure 3: G9a promotes tumor recurrence in vivo.**

- A) Western blot analysis for G9a expression in primary (n=7) and recurrent (n=7) MTB;TAN tumors. Quantification of each G9a isoform is shown relative to primary tumor #1.
- B) Western blot analysis for G9a expression in primary (n=3) and recurrent (n=5) tumor-derived cell lines. Quantification of each G9a isoform is shown relative to primary cell line #1 is shown.
- C) Kaplan-Meier survival curves showing time until primary tumor formation ( $\sim 75$  mm<sup>3</sup>) for mice injected orthotopically with sgNT, sgG9a#1, or sgG9a#2-expressing primary tumor cells (primary #2; n=10 mice / cohort) . Statistical significance was determined by Mantel-Cox log-rank test.
- D) Western blot analysis of G9a expression in representative primary tumors from panel (C).
- E) Kaplan- Meier survival curves showing recurrence-free survival for sgNT, sgG9a#1, or sgG9a#2-expressing tumors. P values, hazards ratios, and 95% confidence intervals are indicated as compared to sgNT. Statistical significance was determined by Mantel-Cox log-rank test.
- F) Mean tumor growth curves for recurrent tumor cell line #3 injected bilaterally into the mammary gland of FVB mice (n=10 tumors / cohort) and treated with vehicle or 10 mg/kg BIX-01294 three times a week. Arrows

indicate drug treatments. Significance was determined by repeated-measures 2-way ANOVA (Time x Treatment) with Sidak's post-hoc test.

G) Area under the curve (AUC) values for tumor growth curves shown in (F). Significance was determined by Student's unpaired t-test.

H) Mean tumor growth curves for primary tumor cell line #2 injected bilaterally into the mammary gland of TAN mice (n=10 tumors / cohort) and treated with vehicle or 10 mg/kg BIX-01294 three times a week for two weeks. Arrows indicate drug treatments. Significance was determined by repeated-measures 2-way ANOVA (Time x Treatment) with Sidak's post-hoc test.

I) Area under the curve (AUC) values for tumor growth curves shown in (H). Significance was determined by Student's unpaired t-test.

J) Kaplan- Meier survival curves showing recurrence-free survival for control or G9a-overexpressing tumors. Statistical significance was determined by Mantel-Cox log-rank test.

Results from A are representative of three independent experiments. Results from B are representative of two independent experiments.

Error bars denote mean  $\pm$  SEM. \*P < 0.05, \*\* P<0.01, \*\*\*P<0.001.

**Figure 4: Integrated epigenetic and transcriptional analysis of G9a-regulated genes in recurrent tumors.**

A) Comparison of gene expression changes 16 hours after BIX-01294 (1  $\mu$ M) treatment in recurrent (x-axis) and primary (y-axis) tumor cells. Colored dots indicate genes whose expression was differentially regulated by BIX treatment in primary vs. recurrent tumor cells (adjusted P-value <0.05).

B) Heatmap showing median-centered, Z-score normalized expression changes for differentially genes from (A).

C) A G9a gene signature was generated by overlapping genes upregulated following BIX-01294 treatment in recurrent tumor cells (adjusted P-value <0.05) with genes whose promoters had significantly lower H3K9ac in recurrent tumor cells (adjusted P-value <0.05).

D) Kaplan-Meier plots showing distant metastasis-free survival (DMFS) for all tumors (n=1379), HER2-enriched tumors (n=105), and Luminal B tumors (n=225) in patients stratified by high (gray), moderate (red), or low (blue) expression of G9a signature genes.

E) Gene ontology analysis showing pathways enriched in the 342 gene G9a signature from (C).

F-G) GSEA plots showing enrichment of a TNF/NF $\kappa$ B signature (F) and an inflammatory signature (G) in recurrent tumor cells following G9a inhibition.

**Figure 5: G9a-dependent silencing of TNF is required for recurrent tumor cell survival.**

A) Scatterplot showing genes induced following BIX-01294 treatment in recurrent tumor cells (y-axis) as a function of differential H3K9ac peaks in recurrent tumor cells (x-axis). Dashed line indicates 2-fold mRNA upregulation. Inflammatory genes identified from the G9a-regulated gene set are indicated in black.

B) qPCR analysis for TNF expression 16 hours after BIX-01294 treatment (1  $\mu$ M) in recurrent and primary tumor cell lines. Expression values were normalized to the vehicle within each cell line.

C) ChIP-qPCR showing H3K9me2 enrichment at the TNF promoter in recurrent and primary tumor cells.

D) ChIP-qPCR showing H3K9me2 enrichment at the TNF promoter in recurrent cell lines following 16 hours of 1  $\mu$ M BIX-01294 treatment.

E) Cell viability of primary and recurrent tumor cells treated with TNF (10 ng/mL) for 3 days. Significance was determined by one-way ANOVA and Tukey's post-hoc test.

F) Representative colony formation assays showing viability of primary and recurrent tumor cells after 7-day treatment with TNF (10 ng/mL).

Results from panels E-F are representative of at least two independent experiments.

Error bars denote mean  $\pm$  SEM. \*p<0.05, \*\*p<0.001 \*\*\*p<0.0001, ns=not significant.

**Figure 6: G9a inhibition induces necroptotic cell death in recurrent tumors.**

- A) Annexin V/PI staining of recurrent and primary tumor cells treated with vehicle or 1  $\mu$ M BIX-01294 for 16 hours.
- B) Quantification of Annexin V-positive cells from (A). Significance was determined by one-way ANOVA and Tukey's post-hoc test.
- C) Western blot analysis for cleaved PARP (Asp214), cleaved Caspase-3 (Asp175), p-MLKL (S345), and total MLKL in recurrent and primary tumor cells treated with vehicle or 1  $\mu$ M BIX-01294. Staurosporine and TNF + Z-VAD-FMK were included as controls for apoptosis and necroptosis, respectively.
- D) GSEA showing enrichment of a curated necroptosis signature in recurrent tumor cells treated with BIX-01294. P-value and normalized enrichment score are shown.
- E) Cell viability of recurrent tumor cells after 16-hour treatment with BIX-01294 (300 nM) alone or in combination with necrostatin-1 (30  $\mu$ M).
- F) Quantification of Annexin V staining in recurrent tumor cells (#1) treated for 24 hours with BIX-01294 (750 nM) alone or in combination with necrostatin-1 (30  $\mu$ M). Significance in (E) and (F) was determined by one-way ANOVA with Tukey's posthoc test.
- G) Western blot analysis showing p53, p-MLKL (S345), and total MLKL in control or p53-knockout recurrent tumor cells (#3) treated with vehicle or 16 hours with 1  $\mu$ M BIX-01294.

Results from A-C, E-G are representative of at least two independent experiments.

Error bars denote mean  $\pm$  SEM. \* $p$ <0.05, \*\* $p$ <0.01, ns=not significant.

### **Figure 7: Recurrent tumors are dependent on RIPK3.**

- A) RNA transcript counts for RIPK3 in recurrent and primary tumor cells as determined by RNA-seq analysis.
- B) qPCR showing RIPK3 expression in non-Met amplified recurrent tumor cells, Met-amplified recurrent tumor cells, and primary tumor cells.
- C) Western blot analysis for RIPK3 expression in primary and recurrent tumor cells.

D-F) Concentration-response curves for primary and recurrent tumor cells treated with increasing doses of GSK'872 (D), Necrosulfonamide (E), and Necrostatin-1 (F).

G) Cell viability following genetic knockdown of RIPK3 with two independent shRNAs or a scrambled control shRNA.

H) RIPK3-driven recurrent tumors require G9a activity to silence inflammatory cytokine expression and prevent necroptosis.

Error bars denote mean  $\pm$  SEM.

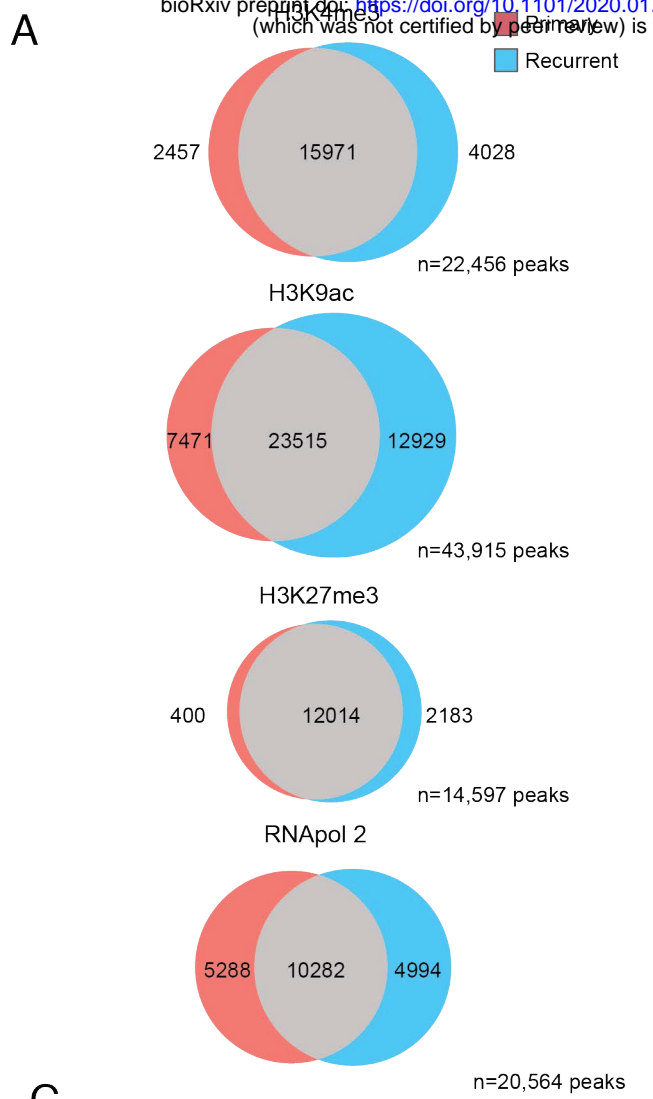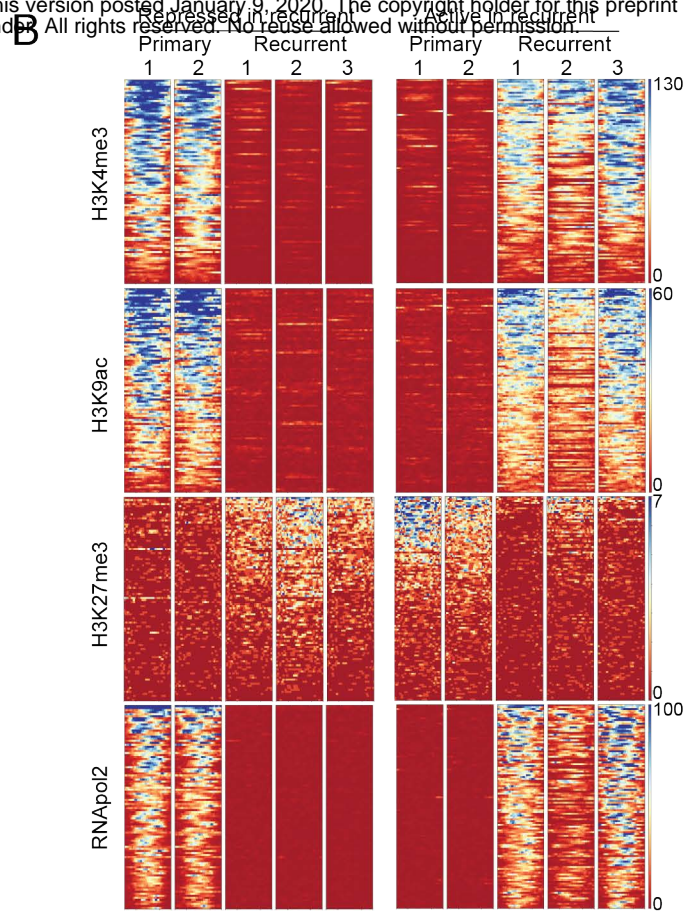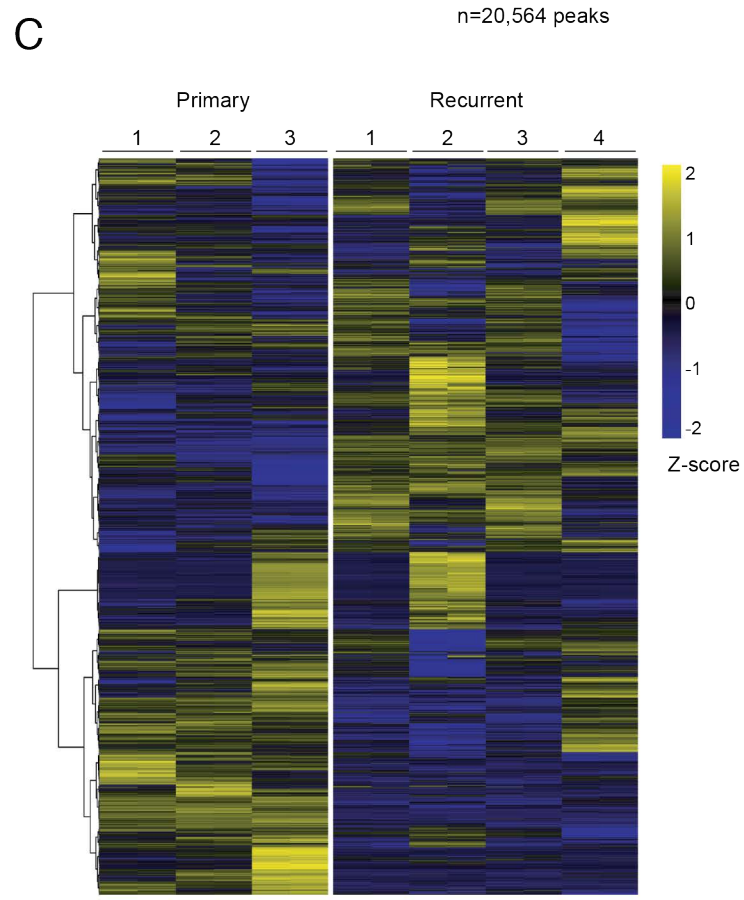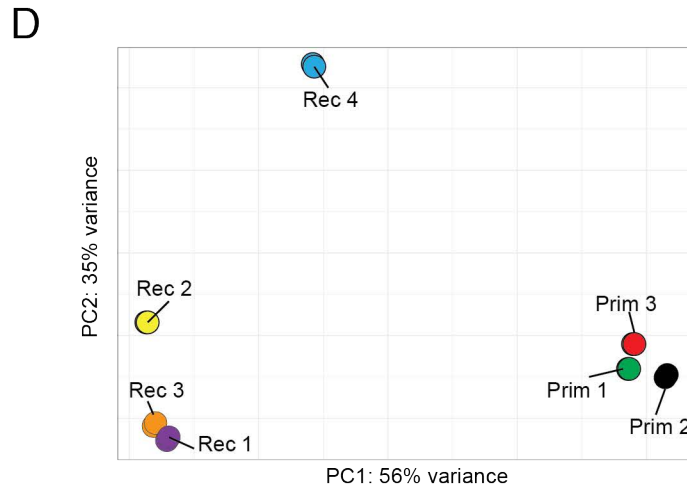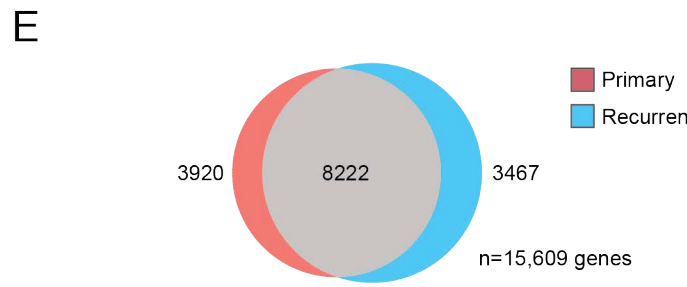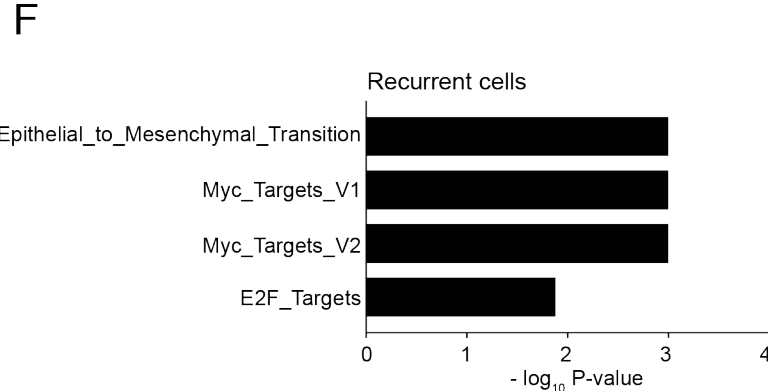

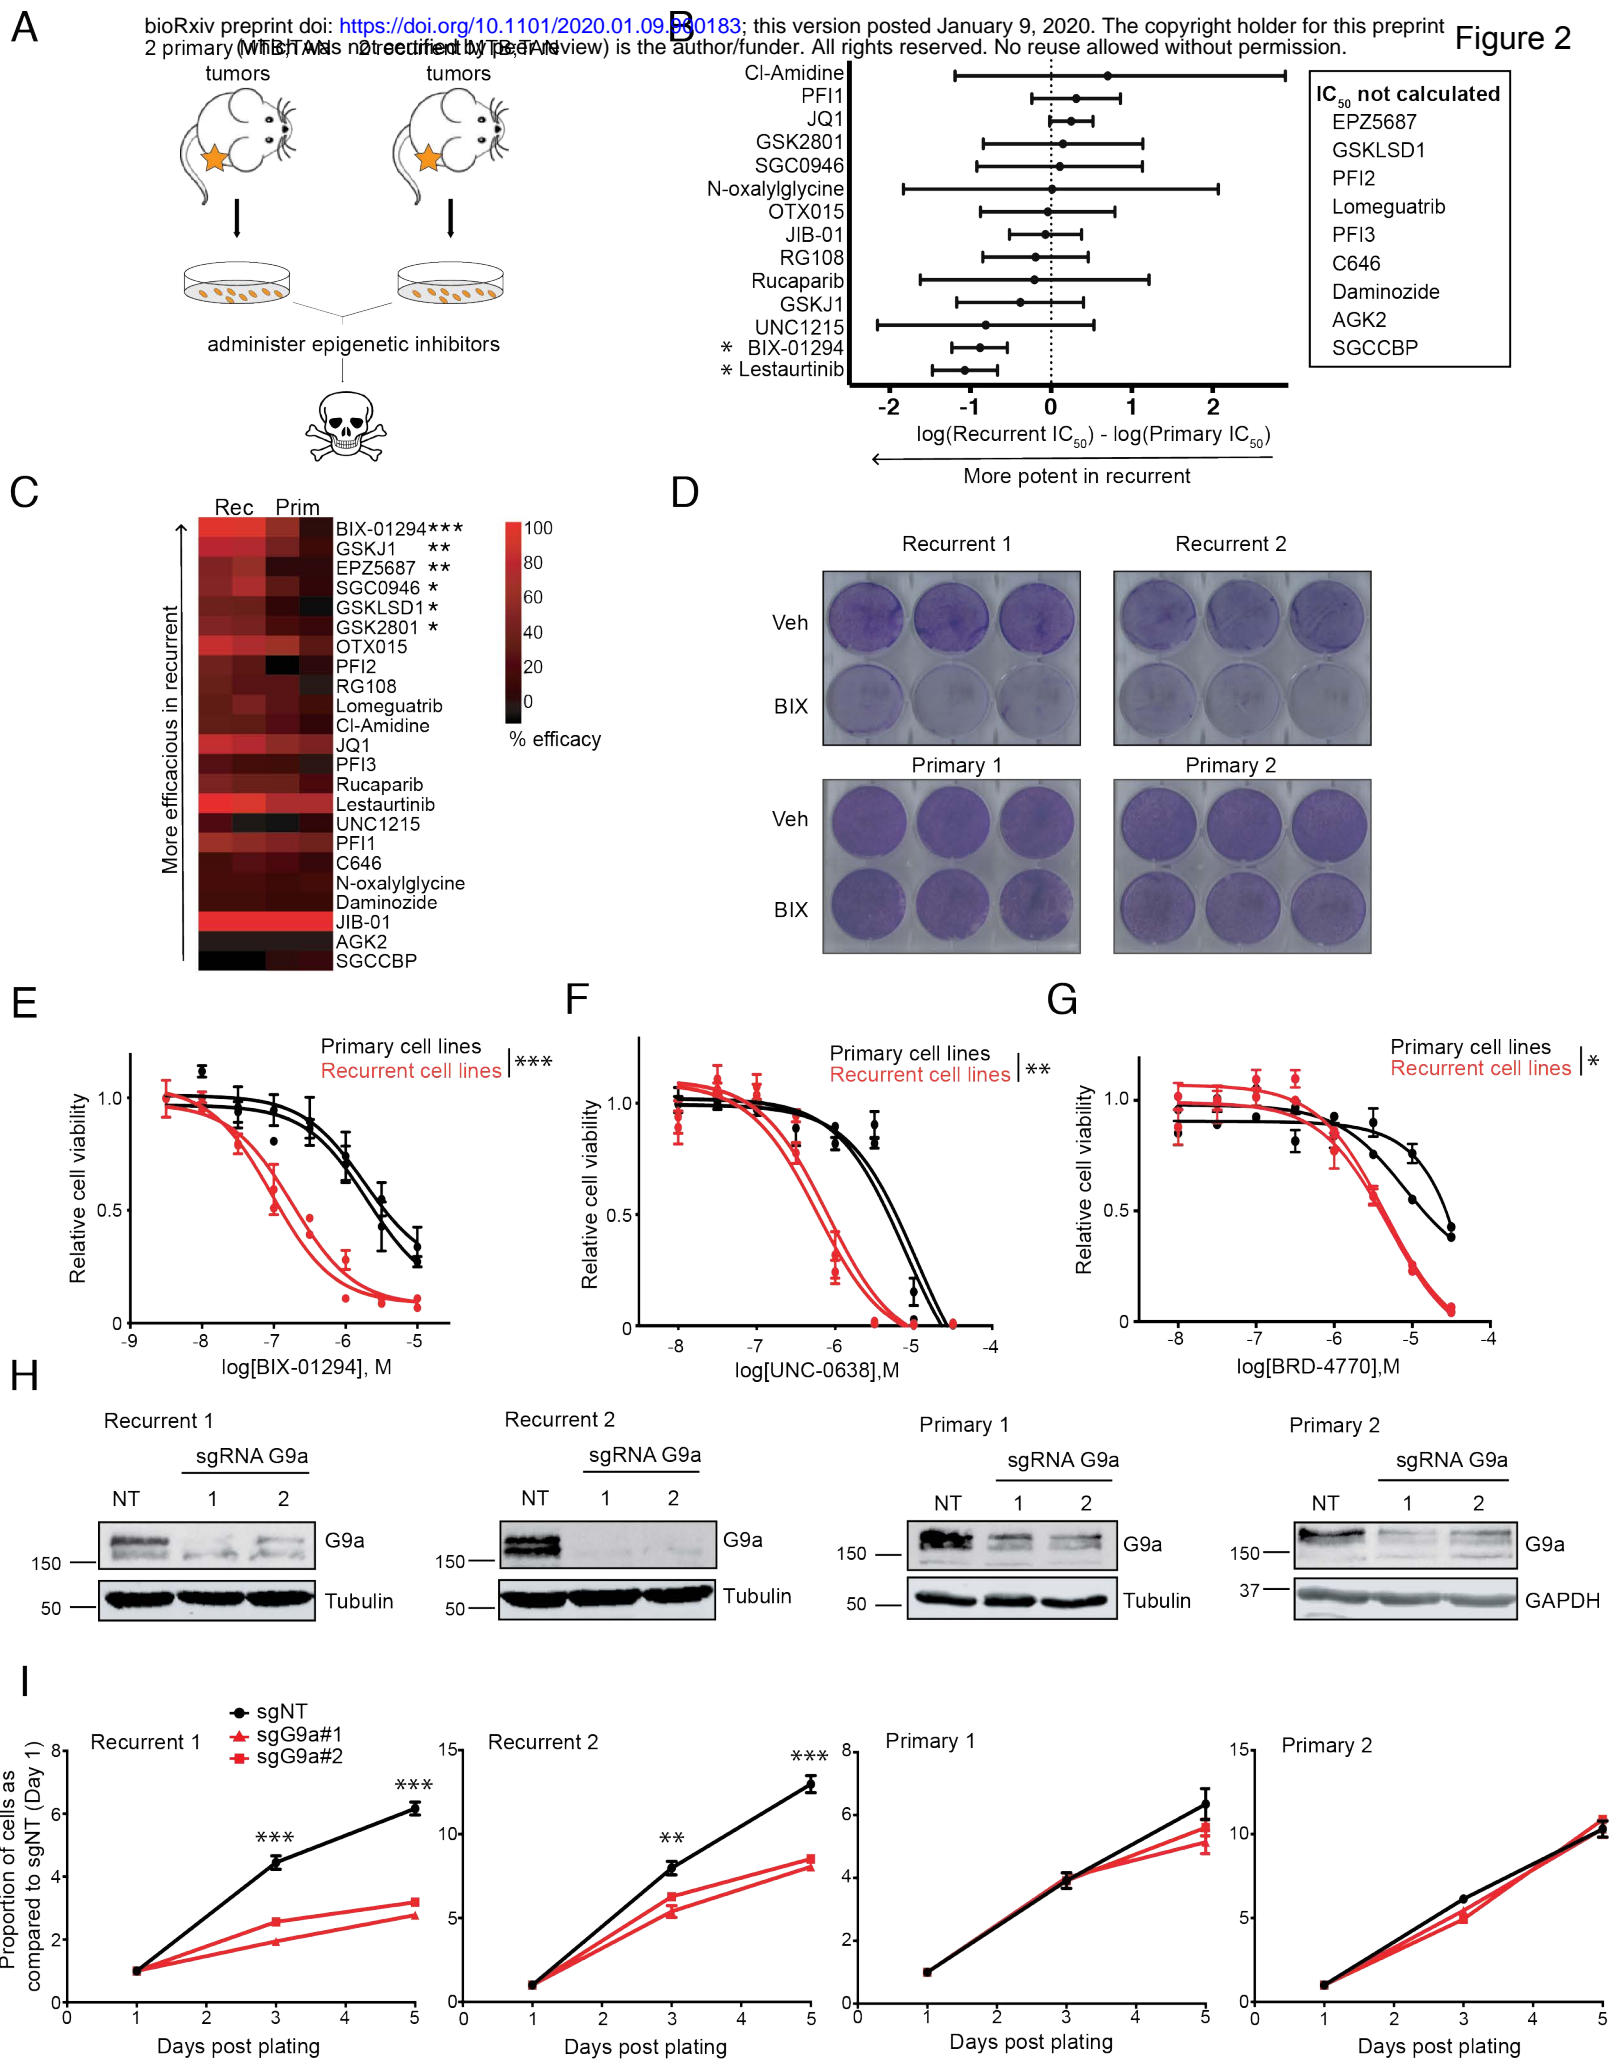



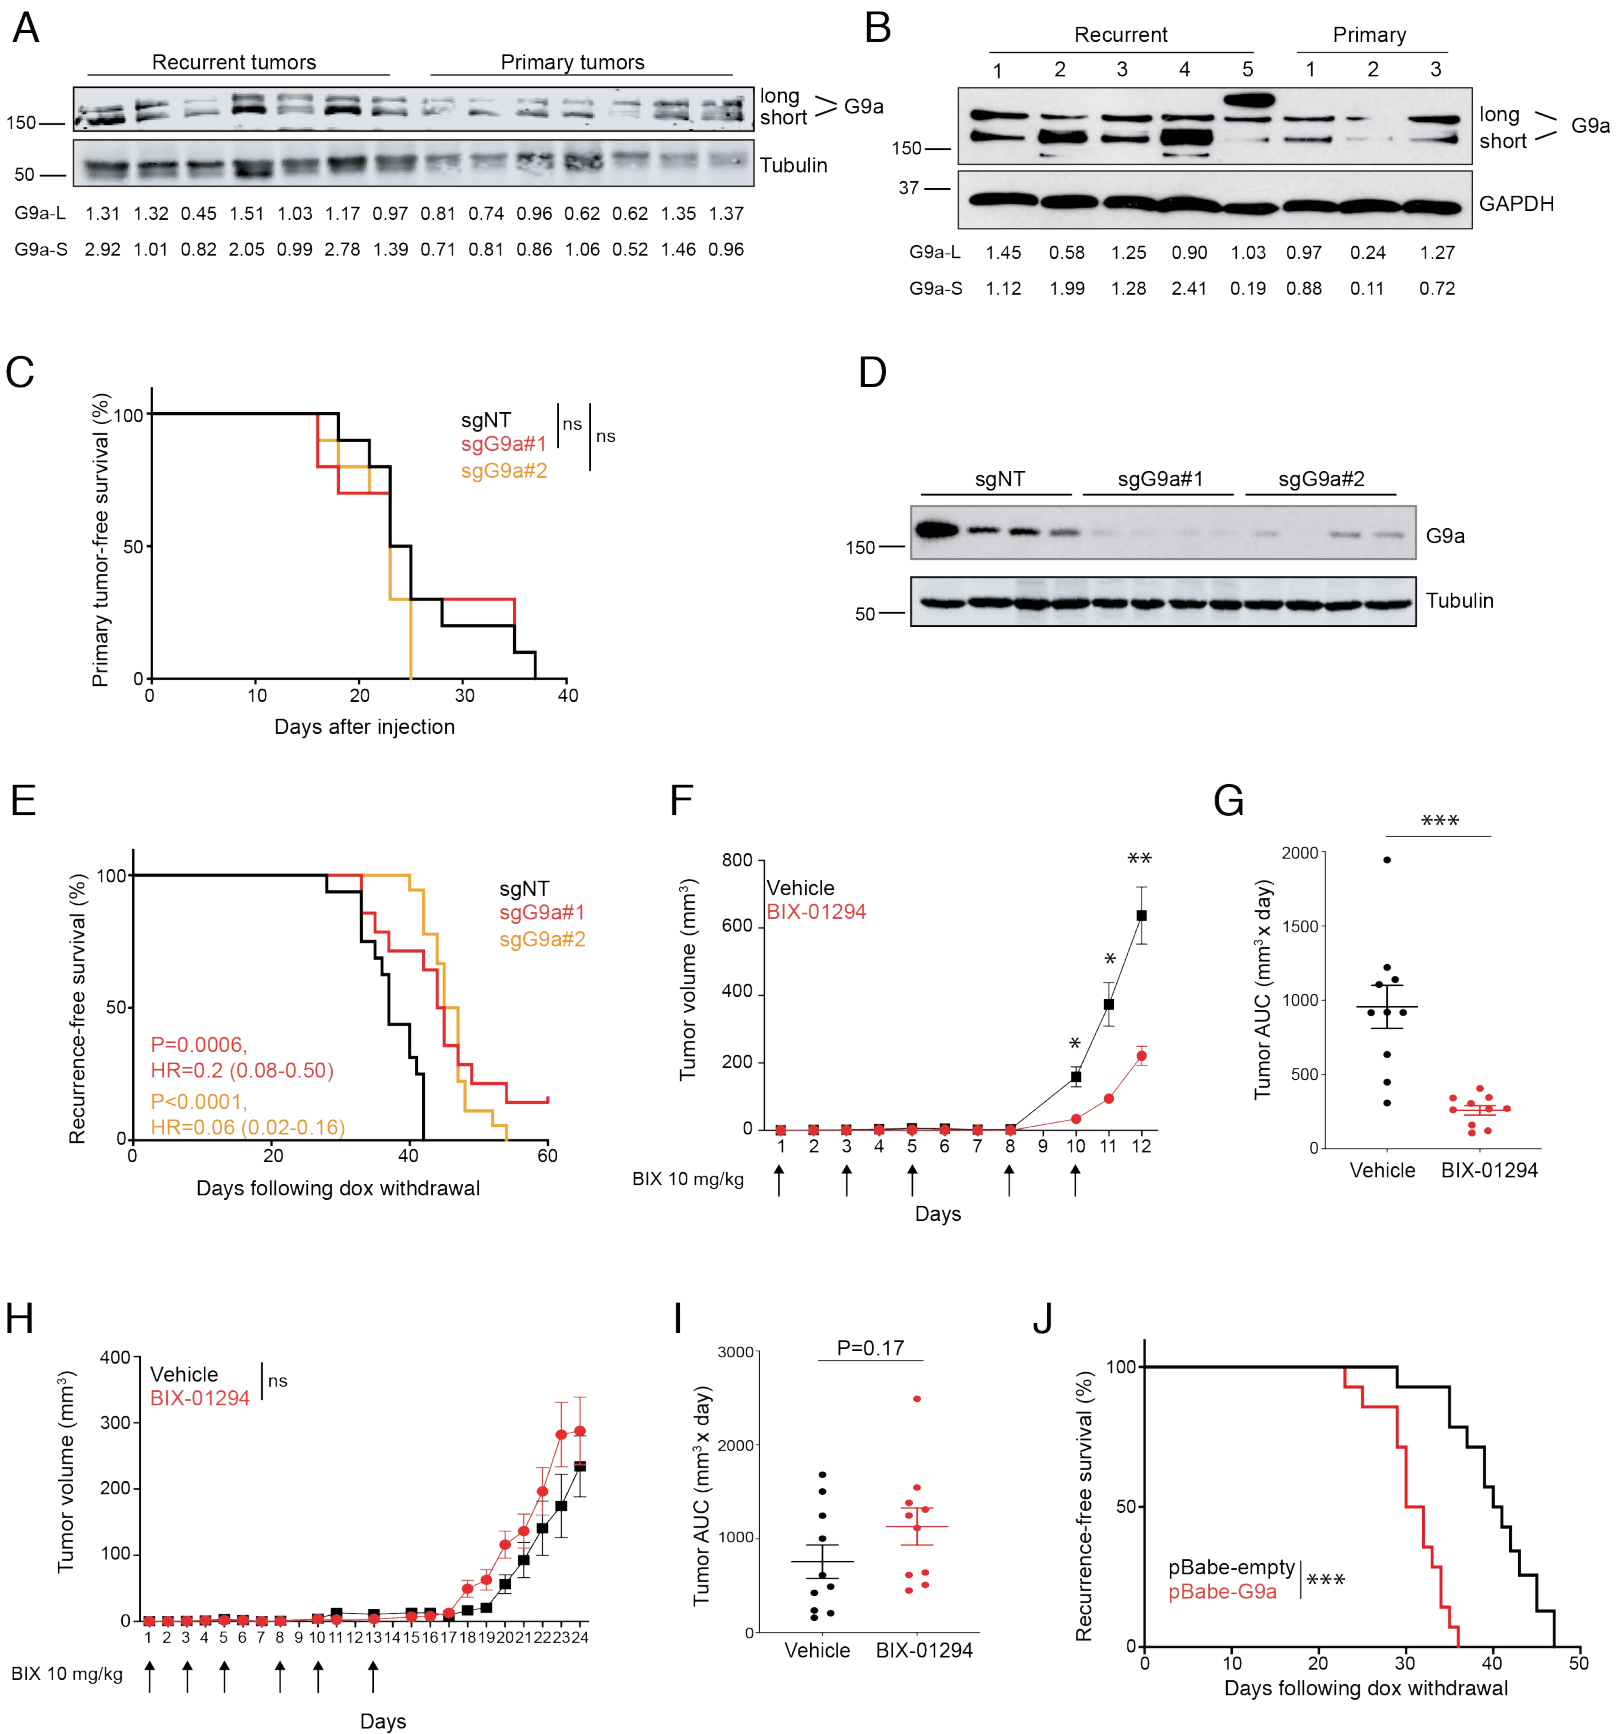

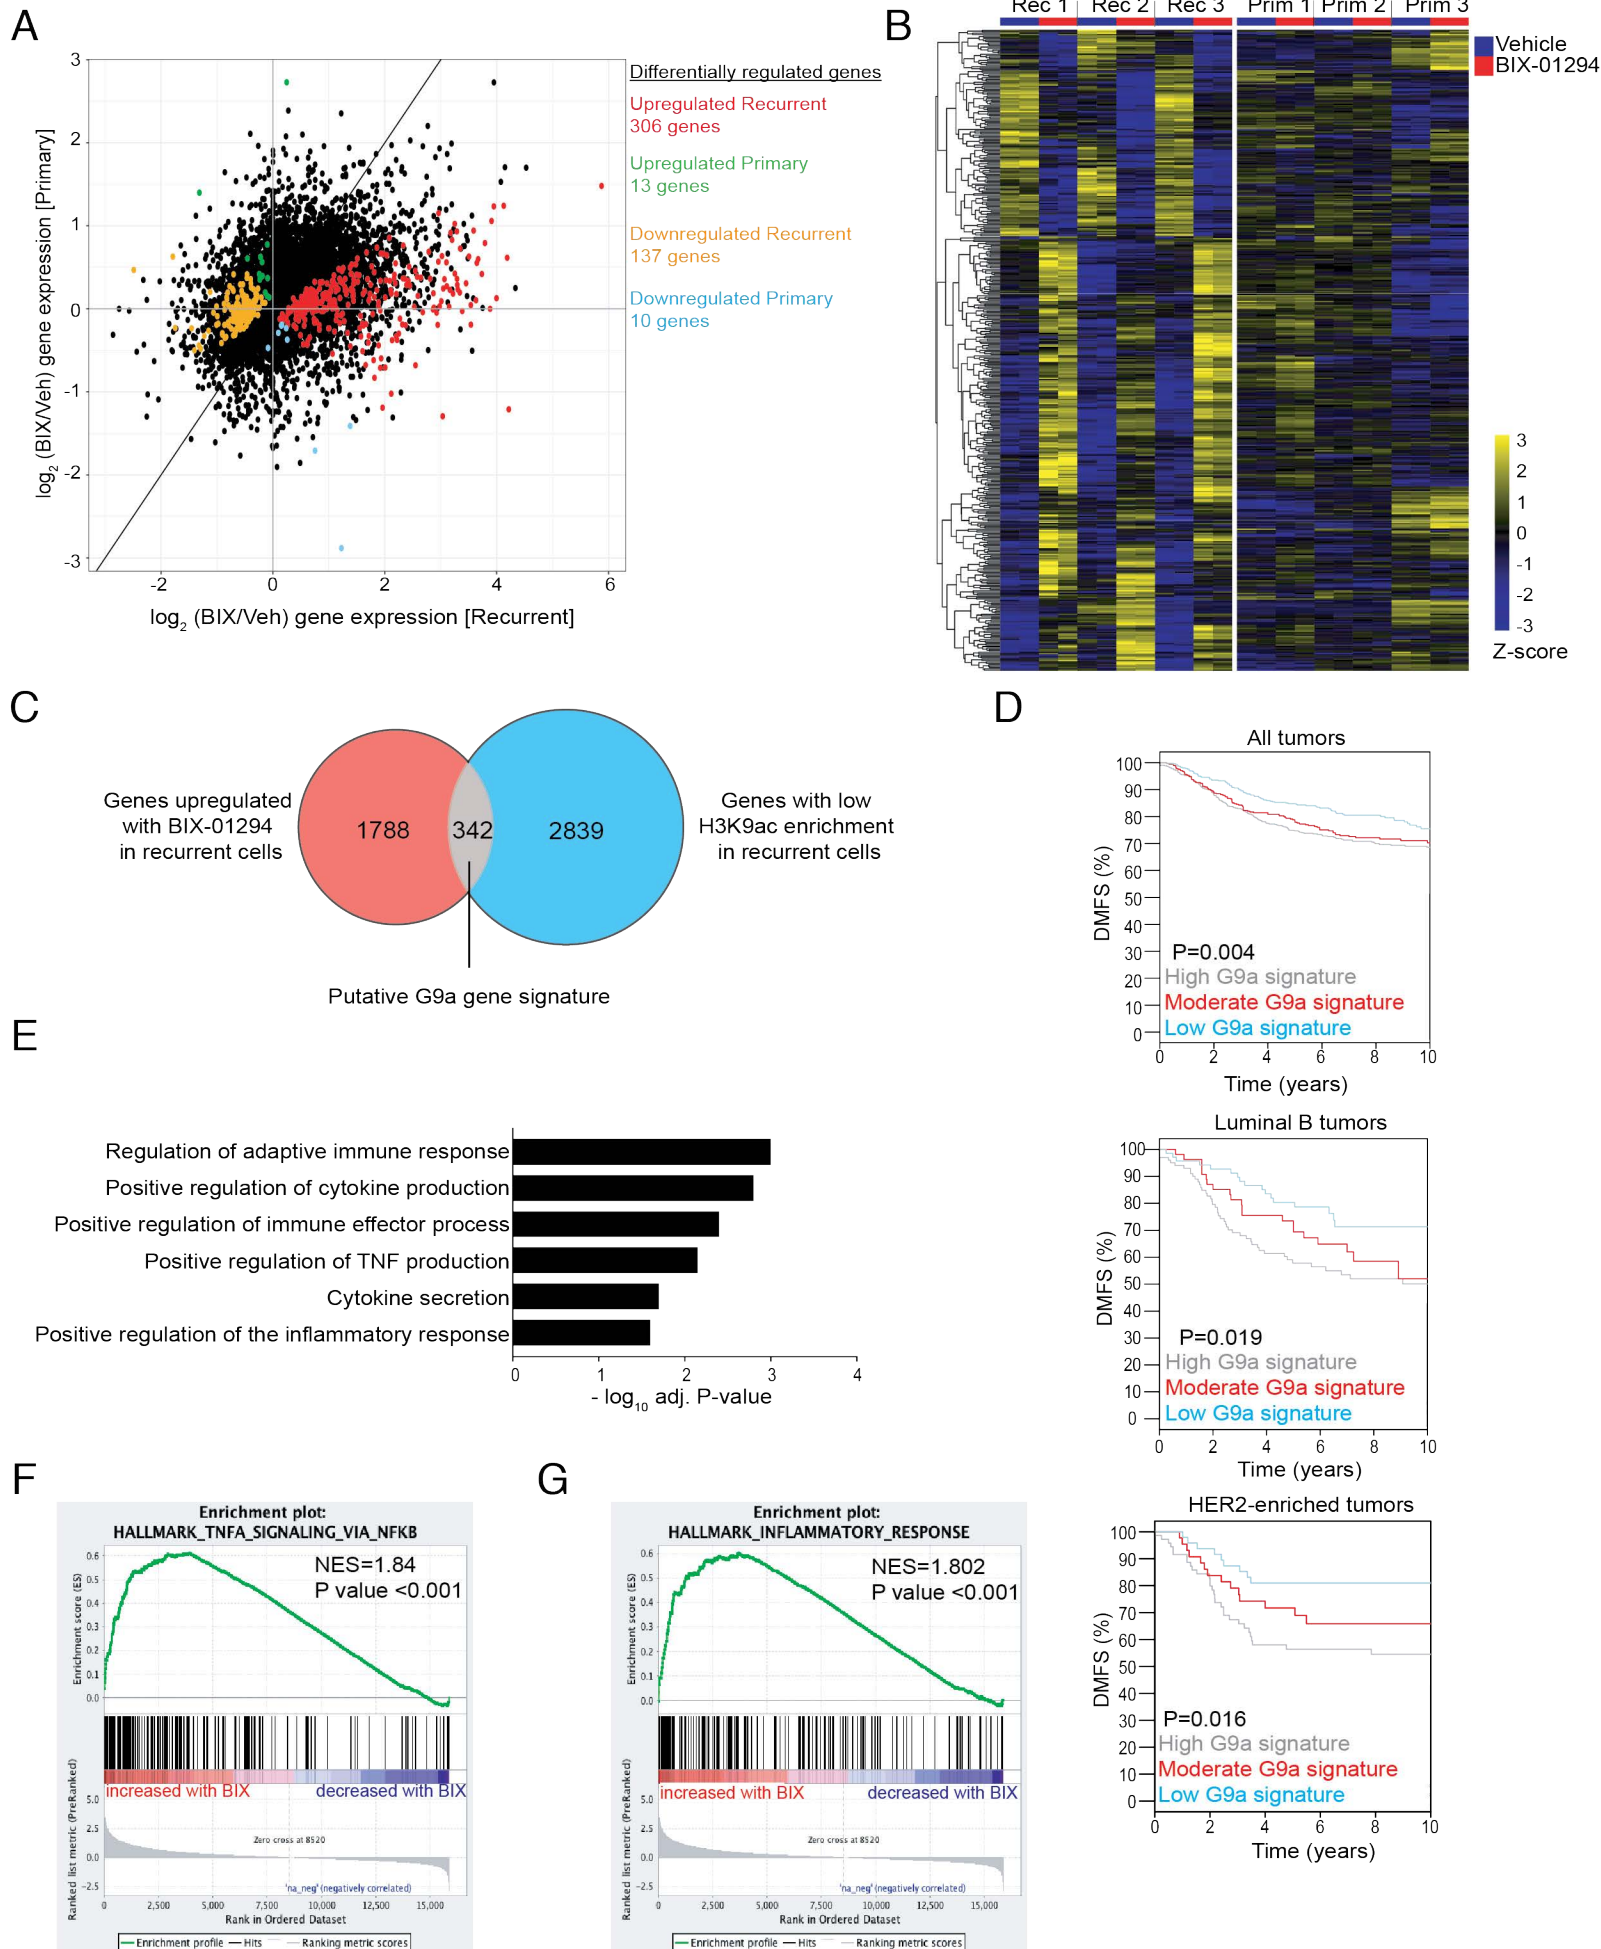

A

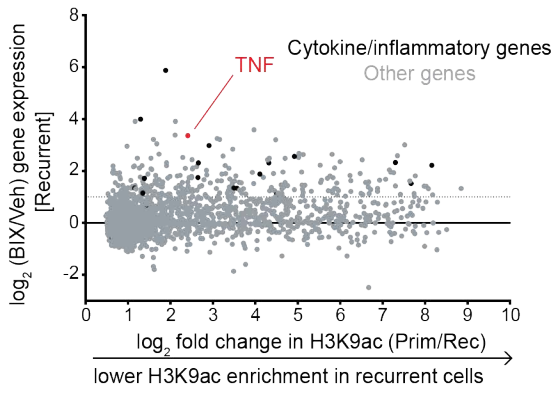

B

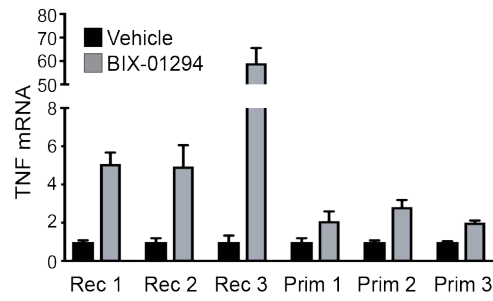

C

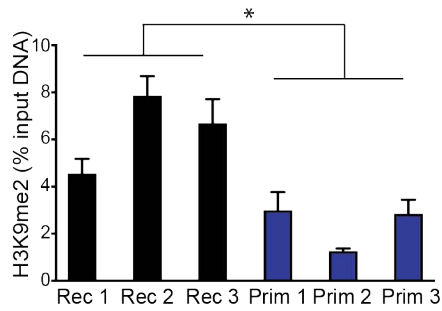

D

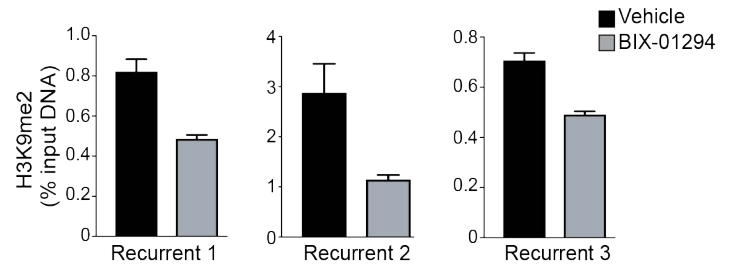

E

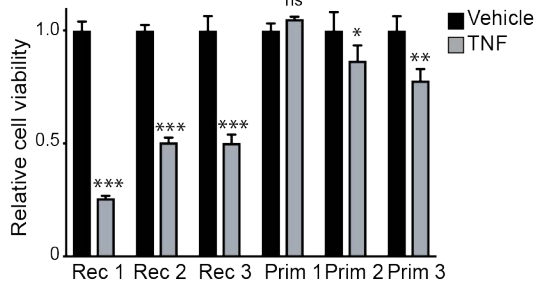

F

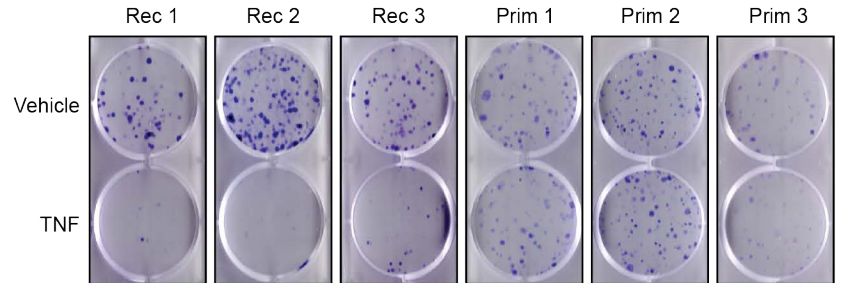

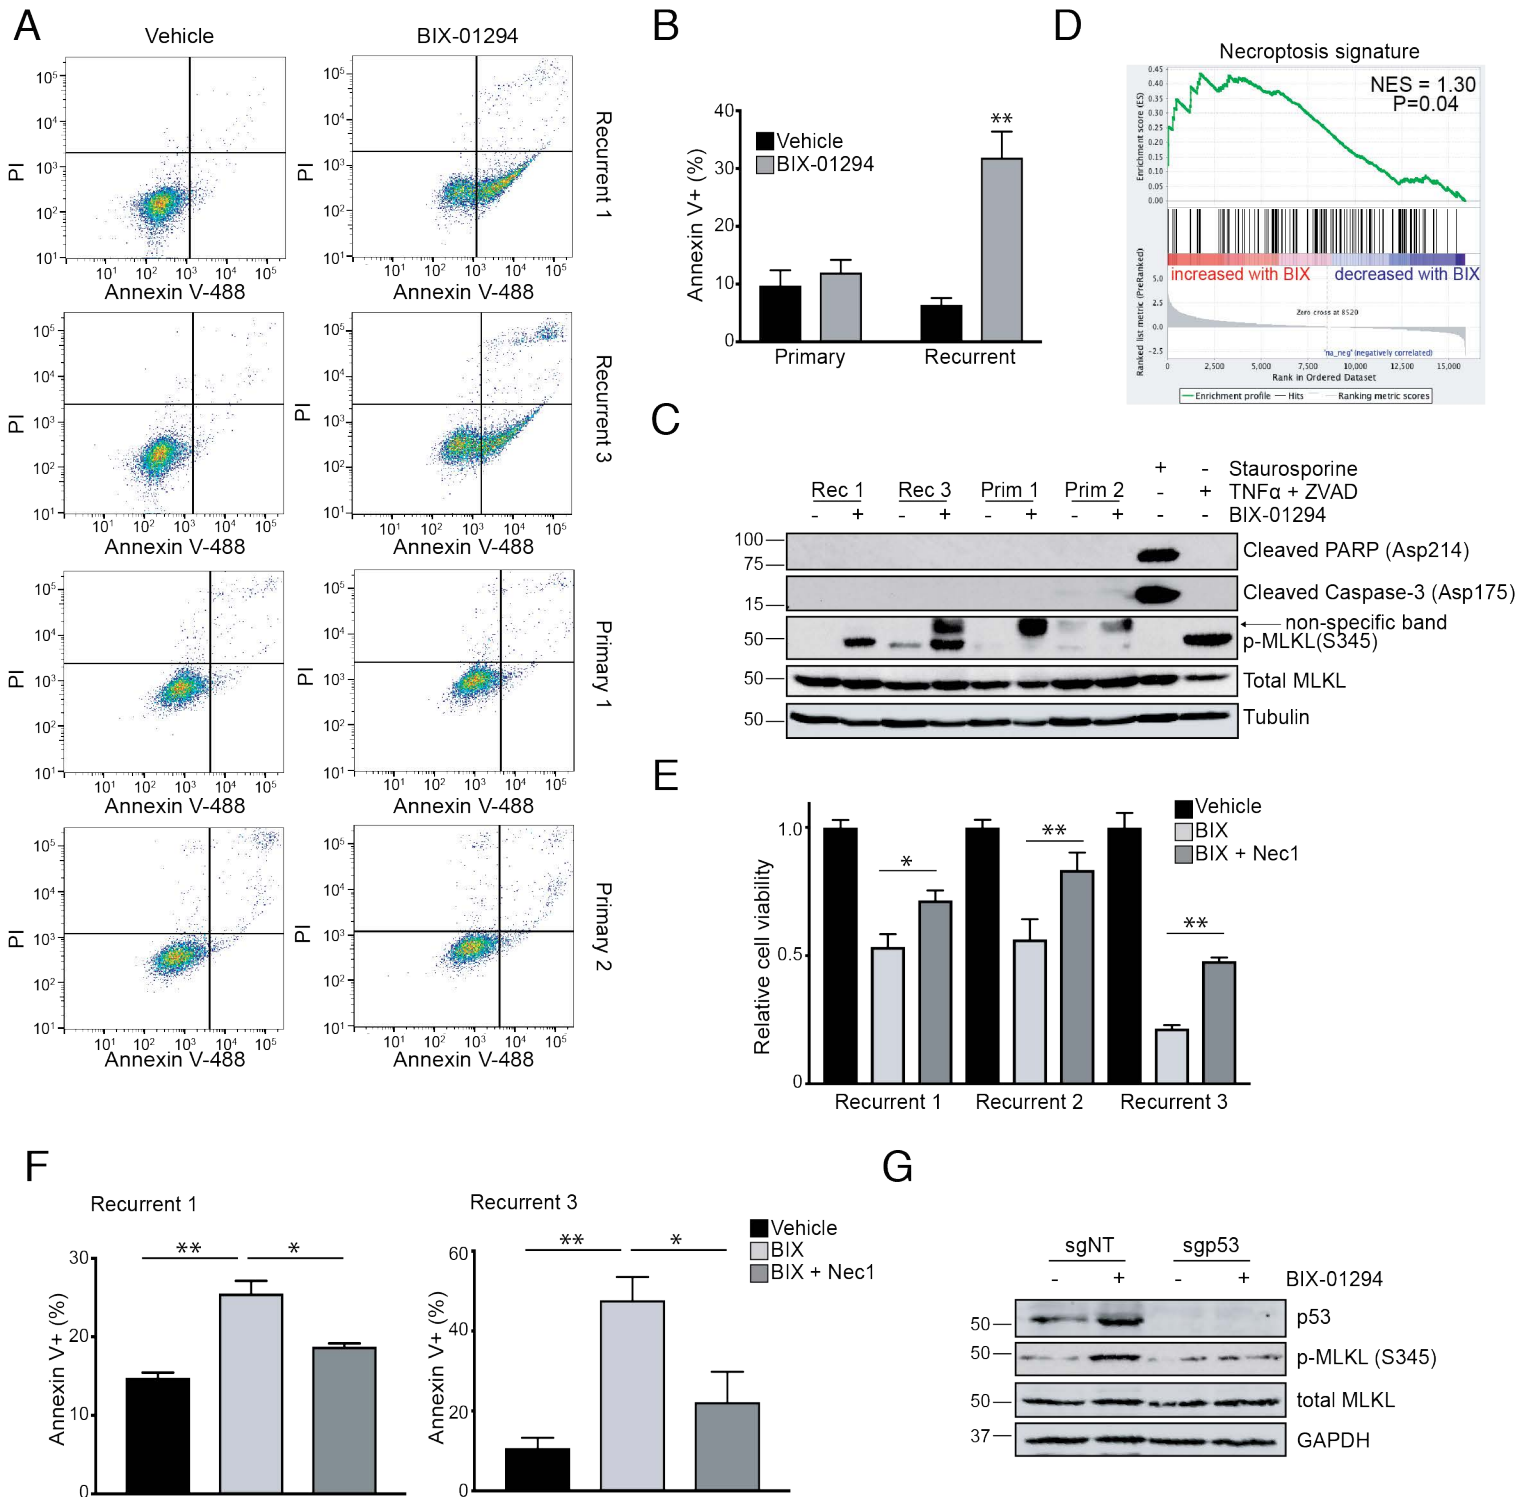

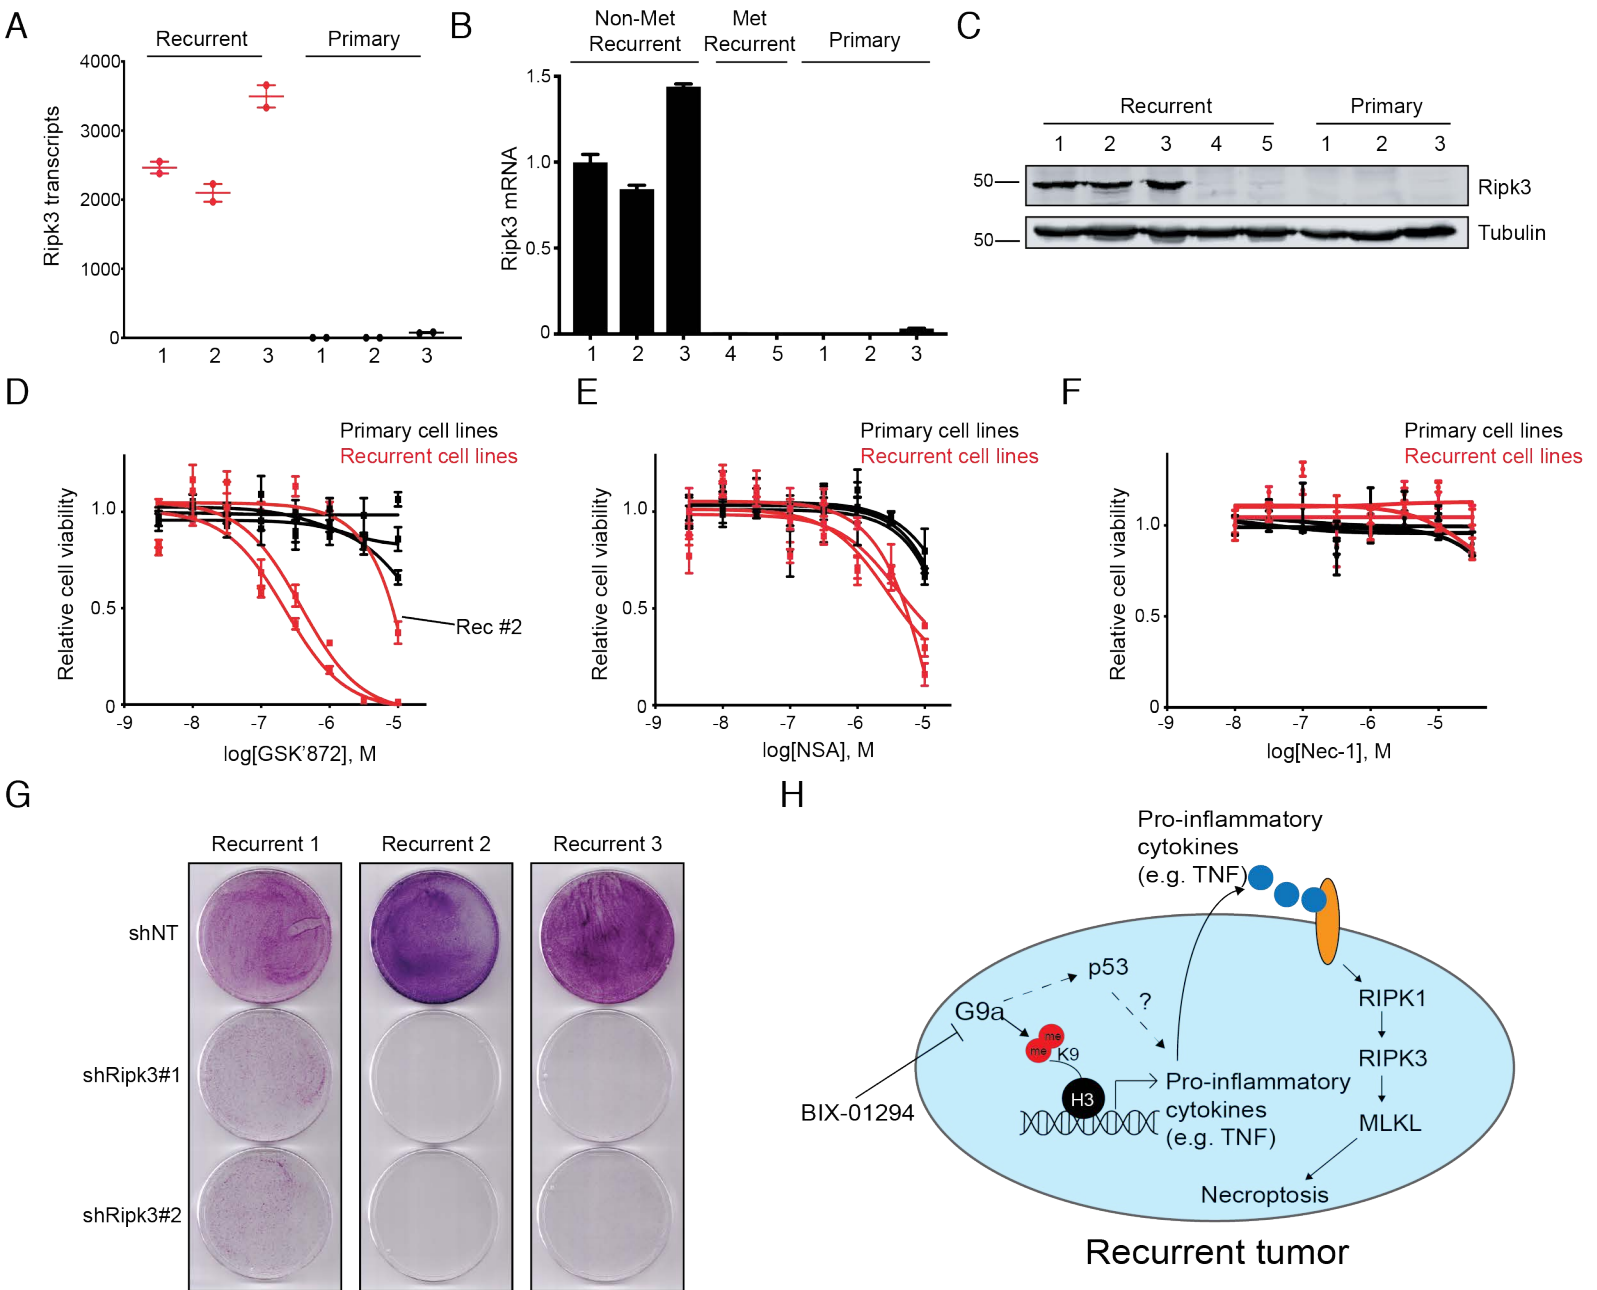

Source: https://www.biorxiv.org/content/10.1101/2020.01.09.900183v1.full.pdf
